1 **Title:** The chromatin remodeler ISWI acts during *Drosophila* development to regulate adult  
2 sleep

3  
4 **Authors:** Naihua N. Gong<sup>1,\*</sup>, Leela Chakravarti Dilley<sup>1,\*</sup>, Charlette E. Williams<sup>1</sup>, Emilia H.  
5 Moscato<sup>1</sup>, Milan Szuperak<sup>1</sup>, Qin Wang<sup>2</sup>, Matthew Jensen<sup>3,4</sup>, Santhosh Girirajan<sup>3,4,5</sup>, Tiong Yang  
6 Tan<sup>6,7</sup>, Matthew A. Deardorff<sup>8,9,10</sup>, Dong Li<sup>11</sup>, Yuanquan Song<sup>2,12</sup>, Matthew S. Kayser<sup>1,13,14,†</sup>

7  
8 **Affiliations**

- 9 1. Department of Psychiatry, Perelman School of Medicine at the University of  
10 Pennsylvania, Philadelphia, PA 19104, USA.
- 11 2. Raymond G. Perelman Center for Cellular and Molecular Therapeutics, Children's  
12 Hospital of Philadelphia, Philadelphia, PA 19104, USA.
- 13 3. Department of Biochemistry and Molecular Biology, Pennsylvania State University,  
14 University Park, PA 16802, USA.
- 15 4. Bioinformatics and Genomics Program, Huck Institutes of the Life Sciences,  
16 Pennsylvania State University, University Park, PA 16802, USA.
- 17 5. Department of Anthropology, Pennsylvania State University, University Park, PA 16802,  
18 USA.
- 19 6. Victorian Clinical Genetics Services, Murdoch Children's Research Institute, Melbourne,  
20 Australia.
- 21 7. Department of Paediatrics, University of Melbourne, Melbourne, Australia.
- 22 8. Division of Human Genetics, The Children's Hospital of Philadelphia, Philadelphia, PA  
23 19104, USA.
- 24 9. Department of Pediatrics, University of Pennsylvania Perelman School of Medicine,  
25 Philadelphia, PA 19104, USA.
- 26 10. Department of Pathology and Laboratory Medicine, Children's Hospital of Los Angeles,  
27 Los Angeles, CA 90027, USA.
- 28 11. Center for Applied Genomics, Children's Hospital of Philadelphia, Philadelphia, PA  
29 19104, USA.
- 30 12. Department of Pathology and Laboratory Medicine, University of Pennsylvania,  
31 Philadelphia, PA 19104, USA.
- 32 13. Department of Neuroscience, Perelman School of Medicine at the University of  
33 Pennsylvania, Philadelphia, PA 19104 USA.
- 34 14. Chronobiology and Sleep Institute, Perelman School of Medicine at the University of  
35 Pennsylvania, Philadelphia, PA 19104 USA.

36  
37 \* These authors contributed equally to this work.

38 † Corresponding author. Email: [kayser@pennmedicine.upenn.edu](mailto:kayser@pennmedicine.upenn.edu).

39 **Abstract**

40 Sleep disruptions are among the most commonly-reported symptoms across neurodevelopmental  
41 disorders (NDDs), but mechanisms linking brain development to normal sleep are largely  
42 unknown. From a *Drosophila* screen of human NDD-associated risk genes, we identified the  
43 chromatin remodeler *Imitation SWItch/SNF (ISWI)* to be required for adult fly sleep. Loss of  
44 *ISWI* also results in disrupted circadian rhythms, memory, and social behavior, but *ISWI* acts in  
45 different cells and during distinct developmental times to affect each of these adult behaviors.  
46 Specifically, *ISWI* expression in type I neuroblasts is required for both adult sleep and formation  
47 of a learning-associated brain region. Expression in flies of the human *ISWI* homologs  
48 *SMARCA1* and *SMARCA5* differentially rescue adult phenotypes. We propose that sleep deficits  
49 are a primary phenotype of early developmental origin in NDDs, and point towards chromatin  
50 remodeling machinery as critical for sleep circuit formation.

## 51 **Introduction**

52           Neurodevelopmental disorders (NDDs) are highly prevalent and diverse diseases related  
53 to abnormal brain maturation. While numerous behavioral phenotypes are commonly associated  
54 with individual genetic mutations in NDDs(1, 2), sleep disturbances are pervasive across NDDs,  
55 and are a significant stressor for individuals and caretakers alike(3, 4). Strong clinical  
56 associations between disrupted sleep and other NDD symptoms(5, 6) suggest that sleep  
57 disturbances may be secondary to broader cognitive or behavioral deficits(7–9), and are therefore  
58 refractory to treatment. Alternatively, sleep dysfunction in NDDs might represent a core  
59 phenotype directly related to pathological developmental processes(10). As sleep is important for  
60 normal neurodevelopment and function(11), early sleep disturbances might exacerbate other  
61 behavioral issues. Given the high prevalence and significant burden of NDD-associated sleep  
62 problems, understanding the mechanistic underpinnings of sleep disruptions is crucial for  
63 developing therapeutic interventions.

64           Sleep in the genetically tractable model organism, *Drosophila melanogaster*, has the  
65 defining behavioral characteristics of vertebrate sleep and is regulated by evolutionarily  
66 conserved signaling pathways(12). These characteristics position *Drosophila* as an ideal, high-  
67 throughput model to 1) identify causative NDD risk genes that affect sleep and 2) investigate  
68 how these same risk genes may contribute to behavioral pleiotropy. To identify mechanisms  
69 underlying NDD-associated sleep disturbances, we screened for sleep abnormalities using RNAi  
70 targeting *Drosophila* homologs of human NDD risk genes. Constitutive knockdown of *Imitation*  
71 *SWItch/SNF (ISWI)* led to dramatic sleep disturbances in the adult fly. Across species, ISWI and  
72 its homologs are ATP-dependent chromatin remodelers that regulate the expression of genes  
73 important for neural stem cell proliferation and differentiation(13–18). Rare variants in the

74 human homologs of *ISWI*, *SMARCA1* and *SMARCA5* (unpublished data), have been implicated  
75 in several NDDs(18–21). Moreover, large-scale genome wide and exome sequencing studies on  
76 patient cohorts have shown that genetic factors contributing to NDDs converge on chromatin  
77 regulation pathways(22, 23). Chromatin dynamics are critical for appropriate gene expression  
78 during key developmental timepoints(24). Thus, dysfunction of these important gene regulatory  
79 hubs likely results in a multitude of downstream biological effects, contributing to behavioral  
80 pleiotropy seen in NDDs. Delineating how chromatin remodelers like *ISWI* control development  
81 of neural circuits involved in diverse behaviors will deepen our understanding of behavioral  
82 pleiotropy in NDDs.

83         In addition to sleep deficits, we found that knockdown of *ISWI* leads to circadian  
84 abnormalities in the adult fly, as well as memory and social dysfunction. Temporal mapping  
85 revealed *ISWI* acts during dissociable pre-adult stages and spatially distinct circuits to affect  
86 these different adult behaviors. At the circuit level, *ISWI* knockdown disrupts the morphology  
87 and function of the adult sleep-regulatory dorsal fan-shaped body (dFB) neurons, likely by  
88 affecting the cell fate of dFB neurons. Expressing either human *SMARCA1* or *SMARCA5* in the  
89 setting of *ISWI* knockdown differentially rescued adult deficits; specifically, *SMARCA5* but not  
90 *SMARCA1* was able to rescue adult fly sleep in the setting of *ISWI* knockdown. Our results  
91 delineate how mutations in a single NDD risk gene give rise to primary disruptions of sleep  
92 circuit development in the setting of behavioral pleiotropy.



93 **Results**

94 *ISWI is necessary for normal sleep in Drosophila*

95         In order to identify NDD risk genes with strong effects on sleep, we took advantage of  
96 high-throughput sleep assays in *Drosophila* (25, 26). We focused on human genes within loci of  
97 interest that have been strongly associated with risk for NDD (1, 27–29). These loci included  
98 chromosomal copy number variants (CNVs) as well as individual risk genes. We performed a  
99 reverse genetic RNAi-based screen of *Drosophila* orthologs of NDD-associated human genes  
100 (**Fig 1A**) using the *elav-GAL4* enhancer to drive expression of *UAS-RNAi* lines in the developing  
101 and adult nervous systems. We individually knocked down 218 genes, comprising a total of 421  
102 unique RNAi lines (including 73 lethal lines) (**Fig 1B-D**). From this screen, we found  
103 knockdown of *Imitation Switch/SNF (ISWI)* dramatically decreased total sleep duration (**Fig**  
104 **1E,F**), with the strongest effect during the night (**Fig 1G**). Pan-neuronal *ISWI* knockdown also  
105 led to more fragmented sleep, due primarily to a reduction in sleep bout length during the day  
106 and the night (**Fig 1H,I**). Although knockdown of several other genes also resulted in increased  
107 sleep fragmentation (**Fig 1C, D**), we chose to focus on *ISWI* given its additional involvement in  
108 total sleep duration. Knockdown with an independent RNAi line for *ISWI* recapitulated the  
109 observed sleep deficits (**Fig 1E,F; Fig S1A-C**). We validated that both tested RNAi constructs  
110 decreased *ISWI* mRNA levels (**Fig S2A**), and found that co-expression of a FLAG- and HA-  
111 tagged RNAi-resistant *UAS-ISWI (UAS-ISWI<sup>Res</sup>-FH)* in the setting of *ISWI* knockdown rescued  
112 sleep deficits (**Fig S2B-F**). These results demonstrate that sleep deficits are specific to the effects  
113 of *ISWI* RNAi-based knockdown. Sleep homeostasis was also impaired in *ISWI* RNAi flies: *elav-*  
114 *GAL4 > UAS-ISWI RNAi* flies exhibited ~300 minutes of sleep loss in response to overnight  
115 mechanical deprivation (**Fig S1D,E**), but in contrast to genetic controls, failed to exhibit sleep

116 rebound (**Fig 1J; Fig S1D,F**). Thus, *ISWI* knockdown results in decreased and fragmented sleep,  
117 as well as deficits in homeostatic rebound.

118

119 *ISWI* knockdown impairs circadian rhythmicity, memory, and courtship behaviors

120 Patients with NDDs exhibit myriad behavioral disruptions in addition to sleep problems,  
121 such as circadian disturbances(30), intellectual disability (ID)(31), and social deficits(5). We  
122 found that, in addition to sleep disruptions, adult flies exhibited circadian arrhythmicity in the  
123 setting of pan-neuronal *ISWI* knockdown (**Fig 2A-C**). *ISWI* knockdown led to significantly  
124 decreased rest:activity rhythm strength (**Fig 2B**), as well as an increase in the percentage of  
125 arrhythmic flies (**Fig 2C; Table S1**). The core molecular clock remained intact (**Fig S3A,B**),  
126 suggesting a disruption of clock output mechanisms.

127 Since memory disruption is a key characteristic of ID(32–37), we next asked whether  
128 *ISWI* knockdown leads to memory deficits in adult flies. We assessed aversive taste conditioning  
129 using the proboscis extension reflex (PER) assay(38) (**Fig 2D**). Flies with pan-neuronal *ISWI*  
130 knockdown exhibited intact learning and gustatory responses, as seen by suppressed PER across  
131 sequential training sessions; however, these flies erroneously extended their proboscis upon  
132 fructose presentation during testing (**Fig 2E**), indicating memory deficits. The mushroom body  
133 (MB) is an associative center in the insect brain that is important for normal memory, including  
134 conditioning responses seen with PER(38). We therefore examined whether *ISWI* knockdown  
135 affects MB structure, and found severe morphologic abnormalities in this brain region: in 100%  
136 of *elav-GAL4 > UAS-ISWI RNAi* brains, we observed bilateral ablation of the vertical  $\alpha/\beta$  lobes  
137 and thinning of the horizontal  $\gamma$  lobes. (**Fig 2F**). Co-expressing *UAS-ISWI<sup>Res</sup>-FH* with *UAS-ISWI*  
138 *RNAi* was sufficient to rescue MB structure (**Fig S2G**). Together, these results suggest *ISWI*

139 knockdown disrupts MB morphology and memory function. Interestingly, although the MB is  
140 known to be involved in adult fly sleep(39, 40), we found MB morphologic deficits were  
141 dissociable from sleep abnormalities: expression of *ISWI* RNAi using the MB driver *OK107-*  
142 *GAL4* did not alter sleep (**Fig S3C-F**) but disrupted MB morphology (**Fig S3G,H**), suggesting  
143 MB dysfunction is not likely to underlie sleep deficits seen in the setting of *ISWI* knockdown.

144 Social dysfunction is another prevalent symptom in NDDs(5). In the male fly, courtship  
145 is a social behavior that can be assayed based on a series of stereotyped behaviors. Pan-neuronal  
146 *ISWI* knockdown in male flies using the *elav-GAL4* driver was lethal, but restricting knockdown  
147 to pre-eclosion using the TARGET system(41) (**Fig 3A**) led to viable males. Male flies with  
148 *ISWI* knockdown limited to the pre-adult stage exhibited significantly decreased courtship index  
149 (time spent courting/total time of assay) and copulation success compared to genetic controls  
150 (**Fig 2G**), suggesting compromised social function. To provide further evidence that *ISWI*  
151 knockdown affects social rather than only reproductive behaviors, we utilized a social space  
152 behavioral assay in which distance between individual flies is measured in a two-dimensional  
153 space(42). Indeed, female *elav-GAL4>UAS-ISWI RNAi* flies exhibited increased social space in  
154 relation to genetic controls (**Fig 2H; Fig S3I,J**). This result supports the conclusion that social  
155 behaviors are disrupted with *ISWI* knockdown, independent of reproductive function. Thus, a  
156 *Drosophila* homolog of an NDD-associated human gene is required for normal sleep, circadian  
157 rhythmicity, memory, and social behaviors.

158

159 *ISWI* is required during the 3<sup>rd</sup> instar larval stage for normal adult sleep

160 *ISWI* and its homologs are involved in neural development and differentiation across  
161 species(13, 16–18). We asked whether *ISWI* is required during pre-adult developmental stages or

162 in an ongoing manner in the adult fly to regulate adult behaviors. We leveraged the TARGET  
163 system(43) to restrict *ISWI* knockdown to pre- or post-eclosion (**Fig 3A**). Pan-neuronal  
164 knockdown only during pre-eclosion significantly decreased total sleep and resulted in sleep  
165 fragmentation, recapitulating the phenotype seen with constitutive *ISWI* knockdown (**Fig 3B; Fig**  
166 **S3A-D**). In contrast, knockdown restricted to the adult had no effect on total sleep or sleep  
167 fragmentation (**Fig 3B; Fig S3A-D**). More refined temporal mapping revealed pan-neuronal  
168 *ISWI* loss from embryonic stages through the mid-3<sup>rd</sup> instar period leads to decreased total sleep  
169 duration and sleep fragmentation similar to constitutive *ISWI* knockdown (**Fig 3E-G; Fig S3A-**  
170 **D**), whereas knockdown only through earlier stages does not (**Fig 3C,D,G; Fig S3A-D**).

171         Given the pre-eclosion role of *ISWI* in determining adult sleep, we wondered whether  
172 sleep deficits arise prior to adulthood. We previously characterized sleep behaviors during the 2<sup>nd</sup>  
173 instar larval stage(44), and found here that *ISWI* knockdown has no effect on sleep during this  
174 larval period (**Fig S4E**). This result is consistent with our finding that *ISWI* knockdown through  
175 2<sup>nd</sup> instar does not affect adult sleep (**Fig 3D**), and is likely acting during mid-3<sup>rd</sup> instar to affect  
176 adult sleep behaviors, presumably by coordinating development of adult sleep-regulatory  
177 circuits.

178         Less severe effects on total sleep duration and sleep fragmentation were also observed  
179 with knockdown through 1<sup>st</sup> and 2<sup>nd</sup> instar stages (**Fig 3C,D; Fig S3A-D**). These phenotypes did  
180 not fully recapitulate constitutive *ISWI* loss, leading us to ask whether such sleep changes were  
181 secondary to circadian disturbances. Temporal mapping of rest:activity rhythm defects revealed  
182 pre-eclosion *ISWI* knockdown also led to adult arrhythmicity (**Fig 4A-C**). However, in contrast  
183 to sleep, knockdown through only the 1<sup>st</sup> instar stage led to adult rest:activity arrhythmicity  
184 comparable to constitutive *ISWI* knockdown (**Fig 4A; Fig S5; Table S2**). This result indicates

185 that *ISWI* knockdown through earlier larval stages primarily results in adult rhythmic deficits,  
186 associated redistribution of sleep across the 24-hour day, and sleep fragmentation. Taken  
187 together, our findings suggest that primary sleep disruptions and behavioral arrhythmicity are  
188 temporally separable to distinct developmental windows of *ISWI* knockdown.

189

190 *ISWI acts during separable pre-adult stages for adult fly memory and social functions*

191 We next investigated the temporal window of *ISWI* action for adult memory and  
192 courtship behaviors. In contrast to sleep, knockdown through only the mid-2<sup>nd</sup> instar stage led to  
193 MB morphologic abnormalities and deficits in aversive taste conditioning (**Fig 4D,E**). These  
194 results suggest the *ISWI*-dependent sleep phenotype does not arise from MB disruptions, as sleep  
195 and memory deficits are temporally dissociable. This conclusion is further supported by our  
196 finding that *ISWI* knockdown in the MB (using *OK107-GAL4*) is associated with MB but not  
197 sleep deficits (**Fig S3C-H**), underscoring *ISWI* functions in distinct circuits and developmental  
198 times for sleep and memory. Finally, male flies exhibited disrupted courtship behavior with *ISWI*  
199 knockdown through early pupation, but not through mid-3<sup>rd</sup> instar (**Fig 4F,G**), dissociating sleep  
200 and courtship behaviors. These results demonstrate *ISWI* acts in different developmental  
201 windows to coordinate distinct adult behaviors (**Fig 4H**).

202

203 *ISWI function in type I neuroblasts is necessary for normal adult sleep and MB morphology*

204 How does *ISWI* affect development of adult fly sleep circuits? Since *elav* is expressed  
205 pan-neuronally(45), we reasoned *ISWI* loss in specific neurons might result in adult fly sleep  
206 deficits. We performed a large neuronal GAL4 screen (>400 lines), but found none of the tested  
207 lines recapitulated sleep loss seen with *elav-GAL4 > UAS-ISWI RNAi* (data not shown). These

208 negative results led us to wonder whether the sleep phenotype seen with *elav*-driven *ISWI*  
209 knockdown is not related to *ISWI* function in neurons. *Elav* is also expressed in larval glial cells  
210 and neuroblasts(46), but restricting *ISWI* knockdown to glia using *repo-GAL4* had no effect on  
211 sleep (**Fig S6A,B**), arguing against a glial role. *ISWI* is necessary for maintaining chromatin  
212 structure in larval neuroblasts(13, 14) and normal progenitor cell proliferation across species(15,  
213 18). To test whether *ISWI* RNAi in all neuroblasts leads to sleep deficits, we knocked down *ISWI*  
214 using *worniu-GAL4* and observed a reduction in sleep duration (**Fig 5A,B**). In addition, *worniu-*  
215 *GAL4 > UAS-ISWI RNAi* flies exhibited decreased night-time sleep and bout length, comparable  
216 to *elav-GAL4 > UAS-ISWI RNAi* flies (**Fig 5C,D**). Knocking down *ISWI* in all neuroblasts also  
217 led to disruptions in MB morphology (100% of MB were abnormal in *worniu-GAL4 > UAS-*  
218 *ISWI RNAi* flies) similar to that seen with *elav-GAL4* driven knockdown (**Fig 5E**). Consistent  
219 with the hypothesis that *ISWI* functions in neuroblasts, *OK107-GAL4* expresses in MB  
220 neuroblasts(47) and also disrupts MB morphology with *ISWI* knockdown (**Fig S3G,H**).

221 We next asked whether *ISWI* knockdown in specific neuroblast lineages are responsible  
222 for adult sleep and MB deficits. In the developing *Drosophila* nervous system, type I and II  
223 neuroblasts undergo asymmetric cell divisions; type II divide into intermediate progenitor cells  
224 (INPs), which are capable of several rounds of cell division before differentiating into  
225 neurons(48, 49). *ISWI* knockdown in type I neuroblasts using *asense-GAL4* significantly  
226 decreased sleep duration (**Fig 5F-H**) and increased sleep fragmentation (**Fig S6C,D**). *Asense* is  
227 also expressed in type II lineage INPs(49), so the sleep phenotype with *asense-GAL4* could result  
228 from *ISWI* knockdown in INPs rather than type I neuroblasts. However, knockdown in INPs  
229 using *R9D11-GAL4* or *R16B06-GAL4*(50) did not disrupt sleep (**Fig 5F-H; Fig S6C,D**),  
230 suggesting *ISWI* acts in type I neuroblasts for adult fly sleep behaviors. Similarly, *ISWI*

231 knockdown in type I neuroblasts, but not in INPs, resulted in MB morphologic deficits (**Fig**  
232 **5I,J**). Thus, *ISWI* function in type I neuroblasts during development is required for normal adult  
233 sleep and MB structure.

234

235 *ISWI* knockdown disrupts morphology and function of sleep-regulatory dorsal fan-shaped body  
236 neurons

237 To understand how *ISWI* knockdown affects sleep regulatory circuits, we focused on the  
238 adult sleep-promoting dorsal fan-shaped body (dFB) neurons that are defined by the *R23E10*  
239 enhancer. dFB neurons are involved in the homeostatic sleep response: sleep deprivation  
240 increases activity of dFB neurons, and activation of these neurons induces sleep(51–53). Since  
241 *ISWI* knockdown results in sleep rebound deficits following mechanical deprivation (**Fig 1J**; **Fig**  
242 **S1D-F**), we hypothesized the sleep-promoting function of dFB neurons might be impaired with  
243 *ISWI* knockdown. In the setting of pan-neuronal *ISWI* knockdown, *R23E10* adult neurons  
244 exhibited abnormal neurite morphology, with aberrant projections to brain regions outside of the  
245 dFB; we also observed abnormal cell body location of *R23E10* adult neurons in the context of  
246 *ISWI* knockdown compared to genetic controls (**Fig 6A**). Quantification of *R23E10* axonal  
247 innervation of the dFB showed decreased innervation volume in the setting of *ISWI* knockdown  
248 (**Fig 6B**). In addition, there was a significant increase in the total number of *R23E10* neurons as  
249 measured by GFP+ soma (**Fig 6C**), suggesting *ISWI* knockdown disrupts dFB neuron cell fate.  
250 Of note, *R23E10-GAL4>UAS-ISWI RNAi* adult flies showed no sleep changes (**Fig S7A,B**).  
251 Since *ISWI* is required during the mid-3<sup>rd</sup> instar stage for normal adult sleep, this result was  
252 anticipated because the *R23E10* driver does not label primordial dFB neurons in the larval  
253 nervous system(54).

254 We next asked whether temporally restricting *ISWI* knockdown to the early  
255 developmental window associated with adult sleep deficits would affect *R23E10* neuron  
256 morphology. In the setting of *ISWI* knockdown through mid-3<sup>rd</sup> instar, we found decreased dFB  
257 innervation volume and increased cell body number (**Fig S7C**). In contrast, while we observed  
258 MB morphologic deficits with *ISWI* knockdown restricted through 2<sup>nd</sup> instar (**Fig 4D**), dFB  
259 morphology remained unchanged compared to genetic controls (**Fig S7C**). These results parallel  
260 our earlier findings that *ISWI* knockdown through 2<sup>nd</sup> instar does not affect adult sleep, while  
261 knockdown through mid-3<sup>rd</sup> instar results in adult sleep deficits. Thus, *ISWI* knockdown appears  
262 to disrupt development of a key group of sleep-promoting neurons, leading to adult sleep  
263 deficits.

264 Since we observed that both dFB morphologic changes and behavioral sleep  
265 abnormalities mapped to the same developmental window, we next asked whether *ISWI*  
266 knockdown resulted in functional dFB abnormalities that could underlie the sleep phenotype. In  
267 the setting of *elav*-driven *ISWI* knockdown, we thermogenetically activated *R23E10* cells by  
268 expressing TrpA1, a heat-sensitive cation channel(55). We collected 24 hours of baseline sleep  
269 (**Fig 6D,E**) and then activated *R23E10* neurons during the day or night (**Fig 6D,F**). While genetic  
270 controls exhibited a robust increase in sleep at the activation temperature during either day or  
271 night, flies with *ISWI* loss failed to show this change (**Fig 6F**). To address differences in baseline  
272 sleep between genetic conditions (**Fig 6E**), we also measured sleep differences between  
273 activation and baseline periods in individual flies (**Fig S7D**). Using this measurement, we found  
274 again that *ISWI* knockdown attenuated the functional effects of *R23E10* activation (**Fig S7E**).  
275 Together, these results suggest *ISWI* knockdown disrupts the development of dFB neurons and  
276 impairs their sleep-promoting function.



277

278 *SMARCA1 and SMARCA5 differentially rescue adult sleep and MB defects*

279 We next tested whether wild-type human *SMARCA1* (*SMARCA1<sup>WT</sup>*) and *SMARCA5*  
280 (*SMARCA5<sup>WT</sup>*) could rescue adult sleep and MB defects in the setting of ISWI knockdown.  
281 Driving *UAS-SMARCA1<sup>WT</sup>* expression with *elav-GAL4* did not rescue ISWI knockdown-induced  
282 sleep deficits (**Fig 7A,B**), but did restore MB morphology as measured by vertical and horizontal  
283 lobe volumes (**Fig 7D,E**). Conversely, *SMARCA5* expression restored sleep (**Fig 7A,B; Fig S8**)  
284 but not all aspects of MB morphology (**Fig 7D,E**). Notably, driving *SMARCA5* expression did  
285 not decrease activity index in the setting of *ISWI* knockdown (**Fig 7C**), demonstrating that sleep  
286 rescue with *SMARCA5* co-expression was not confounded by impaired locomotor behavior.  
287 These results suggest the human homologs of ISWI act separately for the development of circuits  
288 involved in different behaviors.

289 To further investigate mechanisms by which *ISWI* and *SMARCA5* regulate sleep, we  
290 performed RNA-Seq analysis on mid-3<sup>rd</sup> instar larval central nervous systems (CNS) in the  
291 setting of pan-neuronal ISWI knockdown (**Fig S9A**). We chose mid-3<sup>rd</sup> instars because temporal  
292 mapping revealed *ISWI* knockdown during this developmental stage disrupts adult *Drosophila*  
293 sleep (**Fig 3E,F**). Differential gene expression analysis showed ISWI knockdown resulted in 687  
294 differentially expressed genes (DEGs; 381 downregulated and 306 upregulated genes) (**Fig S9B**).  
295 These DEGs were enriched for genes involved in several neuronal and cellular functions,  
296 including axon guidance, mesoderm development, and cell adhesion. Using 679 human  
297 homologs of these DEGs, we performed connectivity analysis in the context of a brain-specific  
298 gene interaction network(56, 57). Compared to all genes in the network, *SMARCA5* exhibited  
299 significantly enhanced connectivity to human homologs of *Drosophila* DEGs (**Fig S9C, D**),

300 suggesting high concordance between *ISWI* and *SMARCA5* in their gene interaction networks.  
301 *SMARCA1* also exhibited significantly increased connectivity to human DEG homologs (**Fig**  
302 **S9D**). *SMARCA5* additionally exhibited increased connectivity to 224 human genes involved in  
303 sleep and circadian rhythm functions (**Fig S9D**) compared to all genes in the network. The  
304 “connector genes” located in the shortest paths between *SMARCA5* or *SMARCA1* to DEGs in the  
305 network were enriched for basic cellular processes such as gene expression, chromosome  
306 organization, response to stress, and DNA repair (**Fig. S9E**). Moreover, connector genes between  
307 *SMARCA5* and human sleep-related genes were involved in neurogenesis, nervous system  
308 development, and Wnt signaling pathways. These results underscore the relevance of *ISWI* in  
309 sleep function and neurodevelopment, and implicate a developmental role for *SMARCA5* in  
310 human sleep gene networks.

311

## 312 **Discussion**

313 Despite clinical heterogeneity among and even within NDDs, sleep disturbances are  
314 highly prevalent across these diverse disorders(3, 4). Clinical evidence points towards a link  
315 between sleep dysfunction and other behavioral symptoms in NDDs(5, 6, 58). Whether sleep  
316 disturbances are a byproduct of other NDD-related deficits or directly result from developmental  
317 disruptions remains a point of debate(3, 7–9). From a sleep-focused screen of *Drosophila*  
318 orthologs of human NDD-associated genes, we found that the chromatin remodeler *ISWI* is  
319 important for adult fly sleep. Knockdown in distinct developmental windows and circuits  
320 resulted in dissociable adult deficits in sleep, circadian, memory, or social behaviors. Notably,  
321 along with other behavioral deficits, our findings demonstrate that sleep disruptions represent a  
322 primary phenotype arising directly from *ISWI* knockdown during pre-adult development.

323 Mutations in chromatin remodelers are strongly associated with NDDs. For example, de  
324 novo mutations in the chromatin remodeler *CHD8* have the strongest overall association with  
325 autism spectrum disorders (ASDs)(22). Indeed, in addition to its role in growth-regulatory  
326 pathways(59, 60), *CHD8* has been shown to interact with and control the expression of other  
327 autism risk genes(61, 62). These lines of evidence suggest chromatin remodelers are ideal  
328 candidates to identify the mechanisms by which behavioral pleiotropy arises in NDDs. Our  
329 results trace how disruptions in a single NDD risk gene affects development of neural circuits  
330 controlling distinct behaviors, and identify a genetic etiology underlying NDD-associated sleep  
331 disruption.

332 *ISWI* and its homologs have been implicated in neural stem cell fate decision, and *ISWI* is  
333 necessary for proper chromatin regulation in larval neuroblasts(13–15). Mouse models with  
334 mutations in *Smarca1* and *Smarca5* exhibit abnormal neural progenitor cell proliferation(16–18).  
335 In our present study, we have begun to parse out the stem cell lineage and timing of events that  
336 lead to specific disruptions in adult behaviors. *ISWI* knockdown in type I neuroblasts disrupted  
337 adult sleep, and resulted in disrupted morphology and function of sleep-promoting *R23E10*  
338 neurons, suggestive of abnormalities in neural stem cell proliferation and differentiation. These  
339 results raise the possibility that *ISWI* knockdown changes the fate of adult sleep-regulatory  
340 neurons, perhaps through dysregulation of temporally expressed transcription factors or cellular  
341 signaling important for neuroblast differentiation. We also found *ISWI* function in type I  
342 neuroblasts to be important for normal MB morphology. Notably, knockdown in MB  
343 neuroblasts, which are type I neuroblasts, was sufficient to disrupt MB morphology but not  
344 sleep, distinguishing the neural substrates underlying *ISWI*-related sleep and memory deficits.  
345 Together with our temporal mapping results, we propose that *ISWI* affects the fate of neural stem

346 cells contributing to adult circuits responsible for separate adult behaviors during the course of  
347 larval development. These results demonstrate the importance of ISWI chromatin remodelers for  
348 development of normal adult behaviors, building on existing evidence that *ISWI* plays a critical  
349 role in neural stem cell differentiation. Determining which populations of stem cells are affected  
350 at a given stage of pre-adult development, and tracing how *ISWI* knockdown affects formation of  
351 specific circuits, is the next step towards understanding how *ISWI* loss disrupts adult behaviors.

352 It remains unknown whether *ISWI* loss specifically in *23E10* cells is causative for the  
353 observed sleep deficits. One limitation of the GAL4/UAS system is the shifting expression  
354 patterns of GAL4 drivers across development(54, 63): the *23E10* driver labels sleep-promoting  
355 dFB neurons in the adult fly, but is expressed in different cells at mid-3<sup>rd</sup> instar. Congruent with  
356 this, *ISWI* knockdown with *23E10* has no effect on adult fly sleep. Work is needed to identify  
357 and genetically access the relevant primordial sleep cells in the larval nervous system.

358 We found that the human homologs of *ISWI*, *SMARCA1* and *SMARCA5*, are able to  
359 rescue sleep deficits and MB disruptions, respectively. Why do *SMARCA1* and *SMARCA5*  
360 differentially rescue sleep and MB abnormalities? One possible explanation lies in mouse studies  
361 that have noted differences in temporal and spatial distributions of *Smarca1* and *Smarca5* in the  
362 developing mouse brain. Differences in protein sequences between *SMARCA1* and *SMARCA5*  
363 may also facilitate differential expression and function. Our results begin to parse the differential  
364 functions of *SMARCA1* and *SMARCA5*, an outstanding question in the field. This is an area of  
365 major interest, as understanding the differences between paralogs in the setting of disease can  
366 inform our knowledge about compensatory effects that paralogs may exert to alter phenotypes.

367 Although mutations in the human *ISWI* homolog *SMARCA1* have been implicated in  
368 diverse NDDs(19–21), to date, there has been no clinical characterization of sleep phenotypes

369 arising from patient mutations in *SMARCA1* and *SMARCA5*. A human brain-specific gene  
370 network analysis shows that *ISWI* and its human homologs interact with a conserved network of  
371 genes. Compellingly, *SMARCA5*, which rescued sleep deficits in the setting of *ISWI* knockdown,  
372 exhibited increased connectivity to human sleep and circadian genes through connector genes  
373 broadly involved in development. These results implicate a role for *SMARCA5* in the  
374 development of normal human sleep regulation. It will be of great interest to assess sleep in  
375 patients with *SMARCA5* mutations given our findings in flies. Moreover, because *ISWI*  
376 knockdown leads to sleep abnormalities in the adult fly, longitudinal patient sleep phenotyping  
377 may reveal sleep differences across the lifespan. In sum, our results provide new insight into the  
378 etiology of sleep disruptions in NDDs, and suggest a mechanism whereby temporally and  
379 spatially constrained gene function underlies behavioral pleiotropy. Importantly, this work  
380 supports the idea that sleep is a developmentally-programmed behavior; sleep abnormalities in  
381 NDDs are not simply a byproduct of broad cognitive/behavioral deficits, but rather emerge from  
382 specific developmental anomalies.

383 **Materials and Methods**

384 Fly stocks

385 Flies were raised and maintained on standard molasses food (8.0% molasses, 0.55% agar, 0.2%  
386 Tegosept, 0.5% propionic acid) at 25°C on a 12hr:12hr light:dark cycle unless otherwise  
387 specified. Unless otherwise specified, female flies were used in all experiments.

388

389 Fly strains

390 The *hs-hid; elav-GAL4; UAS-Dcr2* strain was a gift of Dr. Dragana Rogulja (Harvard  
391 University). *Elav<sup>C155</sup>-GAL4 (elav-GAL4)*, *OK107-GAL4*, *repo-GAL4*, *23E10-GAL4*, were gifts of  
392 Dr. Amita Seghal (University of Pennsylvania). *Worniu-GAL4*, *asense-GAL4*, and *worniu-GAL4*,  
393 *ase-GAL80* were gifts of Dr. Mubarak Syed (University of New Mexico). *UAS-dTrpA1* was a  
394 gift from Dr. Leslie Griffith (Brandeis University). The following strains were purchased from  
395 the Bloomington Drosophila Resource Center: *UAS-ISWI RNAi<sup>HMS00628</sup> (UAS-ISWI RNAi<sup>TRiP}</sup>)*  
396 was used for all experiments unless otherwise specified and from the Harvard Transgenic RNAi  
397 Project (TRiP) (BSC #32845); *UAS-mCD8::GFP* (BSC #5137); *tub-GAL80<sup>ts</sup>* (BSC #7019);  
398 *23E10-GAL4* (BSC #49032); *LexAOp-mCD8::GFP* (BSC #32203); *R9D11-GAL4* (BSC #  
399 40731); *R16B06-GAL4* (BSC # 40731); *elav<sup>C155</sup>-QF2 (elav-QF2)*; BSC #66466). All RNAi  
400 strains used in the primary screen were purchased from Bloomington Drosophila Resource  
401 Center (see Table S1 for a full list of lines). *UAS-ISWI RNAi<sup>GD1467</sup> (UAS-ISWI RNAi<sup>VDRC}</sup>)* was  
402 purchased from the Vienna Drosophila Resource Center (VDRC #24505, construct ID GD1467).  
403 The following fly strains were generated as described below:

404 UAS-ISWI<sup>Res</sup>-FH construct: A vector containing the ISWI gene sequence with a C-terminal

405 FLAG-HA tag under UAS control (UFO10052) was obtained from the Drosophila Genomics

406 Resource Center (NIH Grant 2P40OD010949). The gene location targeted by the HMS00628  
407 ISWI RNAi hairpin (5' ACCCAAGAAGATCAAAGACAA 3') was identified. The Q5 Site-  
408 Directed Mutagenesis Kit (New England BioLabs, cat#E0554S) and corresponding primer  
409 design tool were used to create RNAi-resistant UAS-ISWI. Primers were as follows:

- 410 • Forward: ttaaggataaGGACAAGGAAAAGGATGTG
- 411 • Reverse: ttttttaggcCTACCCTTAGGCTTCGTG.

412 DNA injection was prepared with the Midiprep Kit (Qiagen). Injections were performed by  
413 Rainbow Transgenic Flies, Inc for production of transgenic flies at the attP40 landing site.

414 QUAS-ISWI RNAi construct: QUAS-WALIUM20 vector was obtained from J. Zirin at the Fly  
415 Transgenic RNAi Project(64). The HMS00628 ISWI RNAi hairpin, originally used to generate  
416 the UAS-ISWI RNAi construct (BSC #32845), was cloned into the QUAS-WALIUM20 vector  
417 using the pWALIUM20 cloning protocol (available at [www.flyrnai.org](http://www.flyrnai.org)). Briefly, the following  
418 oligonucleotides were synthesized and annealed (21 NT hairpin sequence shown in capital  
419 letters):

- 420 • 5'ctagcagtACCCAAGAAGATCAAAGACAAtagttatattcaagcataTTGTCTTTGATCTTC  
421 TTGGGTgcg 3'
- 422 • 5'aattcgcACCCAAGAAGATCAAAGACAAatgcttgaatataactaTTGTCTTTGATCTTCT  
423 TGGGTactg 3'.

424 The QUAS-WALIUM20 vector was linearized by NheI and EcoRI, and the DNA fragment  
425 containing the hairpin was ligated into the vector. DNA injection was prepared with the  
426 Midiprep Kit (Qiagen). Injections were performed by Rainbow Transgenic Flies, Inc for  
427 production of transgenic flies at the attP40 and VK00033 landing sites.

428 UAS-SMARCA1 construct: Flies carrying UAS-SMARCA1<sup>WT</sup> were generated using human  
429 *SMARCA1* cloned into the pFastBac Dual vector (Addgene plasmid #102243). Gateway cloning  
430 (Invitrogen) was used to generate the pDonr221-20xUAS (a gift from Dr. Paula Haynes) and  
431 pDonrP2rP3-SMARCA1. Primers for pDonrP2rP3-SMARCA1 were designed by fusing  
432 Gateway attB2r and attB3 sequences upstream and downstream, respectively, of the SMARCA1  
433 sequence. Primer sequences were as follows (capitalized letters indicate Gateway sequences):

434 • Forward, attB2r-SMARCA1:

435 GGGGACAGCTTTCTTGTACAAAGTGGatggaacaagacactgctgcc

436 • Reverse, attB3-SMARCA1:

437 GGGGACAACCTTTGTATAATAAAGTTGttacgacttcaccttctcacatc.

438 A modified pBPGUw, pBPGUw-R1R3-p10(65) (a gift from Dr. Paula Haynes) was used for  
439 gateway recombination. Injections were performed by Rainbow Transgenic flies, Inc for  
440 production of transgenic flies at the attP40 landing site.

441 UAS-SMARCA5 construct: The coding sequence of SMARCA5<sup>WT</sup> was synthesized and cloned  
442 into the pACU2 vector (GenScript). Injections were performed by Rainbow Transgenic Flies, Inc  
443 for production of transgenic flies at the attP2 landing site.

444

#### 445 Sleep assays

446 Adult female flies were collected 2-3 days post-eclosion and aged in group housing on standard

447 food at 25°C on a 12hr:12hr LD cycle (unless otherwise noted). Flies aged 5-7 days were

448 anesthetized on CO<sub>2</sub> pads (Genesee Scientific Cat #59-114) and loaded into individual glass

449 tubes (with 5% sucrose and 2% agar) for monitoring locomotor activity in the *Drosophila*

450 Activity Monitoring (DAM) system (Trikinetics, Waltham MA) or MultiBeam Activity Monitors



451 (Trikinetics, Waltham MA) as denoted in figure legends. All sleep experiments were loaded  
452 between ZT5-ZT10. Data collection began at ZT0 at least 24 hours following CO<sub>2</sub> anesthesia.  
453 Activity was measured in 1 minute bins and sleep was defined as 5 minutes of consolidated  
454 inactivity(25, 26). Data processing was performed using PySolo(66). Mechanical sleep  
455 deprivation was performed using a Trikinetics vortexer mounting plate. Monitors were shaken  
456 for 2 seconds randomly within every 20 second window for 12 hours during the night. Rebound  
457 sleep was calculated as the difference between baseline sleep duration for 12 hours during the  
458 day preceding deprivation and rebound sleep duration for 12 hour during the day immediately  
459 following nighttime deprivation.

460

#### 461 RNAi-based neurodevelopmental disorder-associated gene screen

462 *Drosophila* homologs of human genes of interest were identified by performing protein BLAST  
463 with the human amino acid sequences for closest *Drosophila* homologs (flybase.org/blast;  
464 annotated protein database). Homologs with alignment scores greater than 80 were included in  
465 the screen. Virgins collected from the *hs-hid; elav-GAL4; UAS-Dcr2 (hEGD)* fly stock were  
466 crossed to males of RNAi fly stocks from the Transgenic RNAi Project (TRiP) collection(67).  
467 All available RNAi stocks for a given *Drosophila* gene from the TRiP collection were utilized.  
468 For controls, we used *hEGD* x TRiP library landing site host strains: P{y[+t7.7]=CaryP}attP2  
469 (Chr3, BSC#36303) or P{y[+t7.7]=CaryP}attP40 (Chr2, BSC #36304). Female flies were loaded  
470 into the DAM system and sleep assays were performed as described. Total sleep was compared  
471 between RNAi lines and control lines to identify lines of interest.

472

#### 473 Circadian assays:

474 Female flies were loaded into the DAM system 5-7 days after eclosion as described above and  
475 entrained to a 12:12: LD cycle for 3 days before being transferred to constant darkness (DD).  
476 Locomotor activity during days 2-7 in DD was analyzed in Clocklab software (Actimetrics,  
477 Wilmette, IL). Fast Fourier Transform (FFT) was performed for the locomotor activity collected  
478 during DD, and the maximum amplitude of the FFT was calculated and compared across  
479 genotypes. Flies were categorized as strongly rhythmic ( $\text{FFT} \geq 0.05$ ), moderately rhythmic  
480 ( $0.05 > \text{FFT} \geq 0.03$ ), weakly rhythmic ( $0.03 > \text{FFT} \geq 0.01$ ), or arrhythmic ( $< 0.01$ ).

481

#### 482 Proboscis extension reflex assays:

483 Adult female flies were collected 2-3 days post-eclosion and aged on standard fly food. 5-7 day  
484 old flies were starved for 24 hours in empty food vials on Kimwipe wet with ddH<sub>2</sub>O. After  
485 starvation, flies were anesthetized with CO<sub>2</sub> at ZT1, and the posterior thorax and wings were  
486 gently glued to microscopy glass slides using nail polish under CO<sub>2</sub> anesthesia. Flies were placed  
487 in a humidified chamber and allowed to recover for 5 hours prior to the start of the assay. For  
488 experiments, slides were mounted at a 45 degree angle under a dissecting microscope to observe  
489 proboscis extension. A 1mL syringe was used to present the following solutions to the front tarsi  
490 of each fly: ddH<sub>2</sub>O, 100 mM fructose, 10 mM quinine, or 1000 mM sucrose (Sigma). Flies were  
491 satiated with ddH<sub>2</sub>O prior to the start of the experiment. Pre-training proboscis extension was  
492 tested by presenting 100 mM fructose three times, separated by 10 second intervals. Flies that  
493 did not satiate with ddH<sub>2</sub>O or did not extend to initial fructose presentation (pre-training) were  
494 excluded from the remainder of the experiment. For training rounds, fructose was presented to  
495 the fly tarsi. Quinine was presented to the extended proboscis of each fly, and flies were allowed  
496 to drink for up to 2 seconds. Quinine presentation occurred in 10 second intervals within each

497 training round. There was a one-minute interval between each training round, and a total of three  
498 training rounds before testing. For testing, fructose was presented three times to the fly tarsi with  
499 a 10 second interval between each presentation. At the end of each experiment, flies were given  
500 1000 mM sucrose to check for intact PER, and non-responders were excluded from statistical  
501 analyses. The number of proboscis extensions was recorded during each training round and  
502 during testing, and reported as a percentage of the total number of possible extensions.

503

#### 504 Courtship assays:

505 Newly-eclosed virgin male flies were collected within 4 hours after eclosion, kept in isolation on  
506 regular food, and aged to 3 days post-eclosion prior to the start of courtship experiments. Female  
507 Canton-S virgins (3-7 days post-eclosion) were used in all courtship assays. A single male and  
508 female were gently aspirated into a well-lit porcelain mating chamber (25 mm diameter and 10  
509 mm depth) covered with a glass slide. Experiments were performed in a temperature and  
510 humidity-controlled room at 22°C, 40-50% humidity. Courtship index was determined as the  
511 percentage of time a male was engaged in courtship activity during a period of 10 minutes or  
512 until successful copulation(68). Courtship assays were recorded using a video camera (Sony  
513 HDR-CX405) and scored blinded to experimental condition.

514

#### 515 Social space assays:

516 Newly eclosed virgin female flies were collected within 4 hours after eclosion and housed in  
517 groups of 20 in vials with standard fly food. Flies were aged to 5-7 days post-eclosion before the  
518 start of the assay. The social space arena was made of two 18 cm x 18 cm square glass plates  
519 separated by 0.47 cm acrylic spacers. Two right triangle spacers (8 cm x 16 cm) were placed on

520 opposite sides of the square arena and two rectangular spacers (9 cm x 2 cm) were placed at the  
521 bottom of the arena, resulting in an isosceles triangle-shaped space (base: 15.2 cm and height:  
522 15.2 cm). Flies were gently aspirated into the social space arena by briefly removing the bottom  
523 rectangular spacers. Forty flies were included in each assay. After all 40 flies were introduced to  
524 the arena, the rectangular spacers were replaced, and the bottom of the arena was firmly tapped  
525 down 5 times. Digital images were captured using a video camera (Sony HDR-CX405) after  
526 allowing flies to settle for 20 minutes. Images were imported into Fiji for analysis. For each  
527 image, a body length measurement was taken as the average length in pixels, measured from top  
528 of the head to tip of the abdomen, of 5 randomly selected flies within the arena. The center of  
529 each fly was manually selected, and an automated measure of the nearest neighbor to each  
530 selection was determined using the Nearest Neighbor Distances Calculation plugin on Fiji  
531 ([https://icme.hpc.msstate.edu/mediawiki/index.php/Nearest\\_Neighbor\\_Distances\\_Calculation\\_w](https://icme.hpc.msstate.edu/mediawiki/index.php/Nearest_Neighbor_Distances_Calculation_with_ImageJ)  
532 [ith\\_ImageJ](https://icme.hpc.msstate.edu/mediawiki/index.php/Nearest_Neighbor_Distances_Calculation_with_ImageJ)). Results were binned by body length distances. We calculated a social space index  
533 (SSI) as the difference between the number of flies in the first bin (0-2 body lengths) and the  
534 number of flies in the second bin (2-4 body lengths).

535

#### 536 TARGET system experiments:

537 For development temporal mapping experiments using the TARGET system, parental crosses  
538 were maintained on standard fly food at 18°C. Timed egg lays were achieved by flipping parental  
539 crosses to bottles with standard fly food from ZT1-ZT6 at 28°C, or from ZT1-ZT8 at 18°C. To  
540 achieve *ISWI* knockdown at certain stages, flies were kept at 28°C to allow for GAL80  
541 denaturation. To repress RNAi expression, flies were moved to 18°C to prevent GAL80  
542 denaturation. Due to temperature-related changes in *Drosophila* developmental timing,

543 developmental periods were visually determined. Genetic controls were subject to the same  
544 temperature shifts as experimental flies to account for the effect of changing temperature on  
545 development. Sleep assays were conducted on 5-7 day old female flies at 22°C in 12:12 LD.

546

547 2<sup>nd</sup> instar larval sleep experiments:

548 To synchronize developmental stages, adult fly parental crosses were placed in embryo  
549 collection cages (Genesee Scientific, cat#: 59-100) for 24 hours. Eggs were laid on a petri dish  
550 containing 3% agar, 2% sucrose, and 2.5% apple juice with yeast paste spread on top. Molting 1<sup>st</sup>  
551 instar larvae were collected two days after egg lay and moved to a separate petri dish with yeast  
552 and allowed to molt into 2<sup>nd</sup> instar. Freshly molted 2<sup>nd</sup> instar larvae were placed in the  
553 LarvaLodge to monitor sleep as previously described. Collected data were analyzed using a  
554 custom MATLAB code(44).

555

556 Thermogenetic activation experiments

557 Animals were reared at 18°C to prevent activation of TrpA1 during development. Adult female  
558 flies were collected 2-3 days after eclosion, and aged at 18°C on standard fly food. 5-7 day old  
559 flies were loaded into the DAM system to monitor sleep and placed at 22°C on a 12:12 LD  
560 schedule for 3 days. TrpA1 activation was achieved by a temperature shift to 31°C across non-  
561 consecutive 12-hour light or 12-hour dark period. Between increases in temperature, flies were  
562 kept at 22°C.

563

564 RNA-Seq:

565 Dissection and RNA extraction:

566 40 brains per sample at the mid-3<sup>rd</sup> instar stage were dissected in cold AHL (108 mM NaCl, 5  
567 mM KCl, 2 mM CaCl<sub>2</sub>, 8.2 mM MgCl<sub>2</sub>, 4mM NaHCO<sub>3</sub>, 1 mM NaH<sub>2</sub>PO<sub>4</sub>-H<sub>2</sub>O, 5 mM trehalose,  
568 10 mM sucrose, 5 mM HEPES). Three biological replicates for the control group and four for the  
569 experimental, each with 40 brains, were dissected. Brains were transferred to 1 mL of Trizol and  
570 incubated for 5 minutes at room temperature (RT). 0.2 mL of chloroform was added and samples  
571 were inverted. Samples were incubated 2-3 minutes at RT, then centrifuged at 12,000g for 15  
572 minutes at 4°C. Genomic DNA was removed using a gDNA eliminator column (RNeasy Plus  
573 Micro Kit, Qiagen). RNA was then extracted using the RNeasy MinElute Cleanup Kit (Qiagen).

574 RNA library preparation and sequencing:

575 Sequence libraries for each sample were synthesized using the NEBNext Ultra II Directional  
576 RNA kit following supplier recommendations and were sequenced on Illumina HiSeq-4000  
577 sequencer as single reads of 100 base reads following Illumina's instructions.

578 Differential gene expression analysis:

579 RNA-seq reads were mapped to the *Drosophila melanogaster* assembly BDGP6 pre-indexed  
580 with transcript models from Ensembl 87 using STAR 2.5.0b with default parameters except --  
581 alignIntronMax set to 10,000. Aligned reads were assigned to gene models using the  
582 summarizeOverlaps function of the GenomicRanges R package. Reads per kilobase per million  
583 (RPKMs) were calculated with a slight modification, whereby only reads assigned to annotated  
584 protein-coding genes were used in the denominator, to minimize batch variability due to different  
585 amounts of contaminant ribosomal RNA. Differential expression was determined using the  
586 DESeq2 package. The annotated genes exhibiting an adjusted P-value > 0.1 were considered to  
587 be differentially expressed compared to control. Visualization of differentially expressed genes  
588 was done using R-package ggplot2 v3.2.0.

589 Gene interaction network analysis

590 Human homologs of *Drosophila* DEG in the setting of *ISWI* knockdown were identified using  
591 DIOPT (DRSC Integrative Ortholog Prediction Tool) v.8.0(69). We assessed the connectivity of  
592 *SMARCA5* and *SMARCA1* with these DEG homologs in the context of a brain-specific gene  
593 interaction network(56, 57). This network was constructed using a Bayesian classifier trained on  
594 gene co-expression data, which predicts the likelihood of interactions between pairs of genes in  
595 the brain. We generated a sub-network containing all interactions with weights >2.0 (the top  
596 0.5% of all pairwise interactions) from the entire interaction network. Using the NetworkX  
597 Python package, we next identified the shortest distances as a measure of connectivity, as well as  
598 connector genes within the shortest paths, between the *SMARCA* genes and DEGs(70). We  
599 similarly assessed the connectivity of *SMARCA* genes with 224 human genes annotated for sleep  
600 and circadian rhythm functions (Gene Ontology terms GO:0007623 and GO:0030431). Network  
601 diagrams were generated using Cytoscape v.3.7.2(71)<sup>71</sup>, and Gene Ontology enrichment analysis  
602 of the connector genes was performed using the PantherDB Gene List Analysis tool(72).

603

604 Immunohistochemistry:

605 Fly brains were dissected in 1xPBS with 0.1% Triton-X 100 (PBST) and fixed in 4% PFA for 15  
606 minutes at room temperature. Following 3x10 minute washes in PBST, brains were incubated  
607 with primary antibody at 4°C overnight. Brains were washed 3x10 minutes in PBST, and  
608 incubated with secondary antibody for 2 hours at room temperature. After 3x10 minute PBST  
609 washes, brains were cleared in 50% glycerol and mounted in Vectashield. The following primary  
610 antibodies were used at 1:1000 dilutions: mouse 1D4 anti-Fasciclin II (anti-FasII; Developmental  
611 Studies Hybridoma Bank), rabbit anti-HA-Tag (Cell Signaling), guinea pig anti-PER (a gift

612 from Dr. Amita Seghal) and rabbit anti-GFP (Thermo Fisher). The following secondary  
613 antibodies were used at 1:1000 dilutions: Alexa Fluor 488 Donkey anti-mouse, Alexa Fluor 488  
614 Donkey anti-rabbit, Alexa Fluor 488 Donkey anti-guinea pig, and Alexa Fluor 647 Donkey anti-  
615 mouse (Thermo Fisher).

616

## 617 Imaging and analysis

618 Microscopy images were taken using a Leica TCS SP8 confocal microscope. Images were  
619 processed in NIH Fiji. All settings were kept constant between conditions within a given  
620 experiment. Images were taken in 1.0um steps unless otherwise noted.

### 621 1. PER quantification

622 To investigate PER expression in sLNVs and ILNVs, brains were co-stained with anti-  
623 PDF (to label relevant cells) and anti-PER antibodies. Brains were dissected at CT0, CT4,  
624 CT12, and CT20. We defined the area of each sLNV or ILNV cell body by PDF staining.  
625 Area, mean gray value, and integrated density of the PER signal was measured for each  
626 cell body. Corrected total cell fluorescence (CTCF) of the cell body was calculated with  
627 the formula:  $CTCF = \text{Integrated density}_{\text{cell}} - (\text{Area}_{\text{cell}} \times \text{Mean background fluorescence})$ .  
628 All cells per brain were averaged and compared across genotypes.

### 629 2. MB quantification

630 For temporal mapping, spatial mapping (*OK107-GAL4 > UAS-ISWI RNAi*), and  
631 neuroblast experiments, a maximum projection image of all Z-slices was generated. MB  
632 morphology was manually quantified from the maximum projection as a binary normal  
633 vs abnormal based on anti-FasII staining and prior description of normal MB  
634 morphology. For *SMARCA1<sup>WT</sup>* and *SMARCA5<sup>WT</sup>* rescue experiments, for each Z-slice, the



635 vertical or horizontal lobe on one hemisphere was manually outlined. The full volume of  
636 the vertical or horizontal lobe was measured using the 3D Objects counter function in Fiji  
637 with the following settings: threshold = 1 and minimum puncta size = 100.

638 3. dFB volume

639 For each Z-slice, the dFB was selected based on anti-GFP staining for *R23E10* dFB  
640 projections. The full volume of the dFB was measured using the 3D Objects Counter  
641 function in Fiji with the following settings: threshold = 1 and minimum puncta size =  
642 10000.

643 4. dFB cell body count

644 GFP-positive soma were counted across the entire brain based on anti-GFP staining for  
645 *R23E10* neurons.

646

647 Statistical Analysis:

648 All statistical analyses were performed using GraphPad Prism (version 8.4.1). Sample size,  
649 specific tests, and significance values are denoted in figure legends.

650 **References**

- 651 1. S. J. Sanders, X. He, A. J. Willsey, A. G. Ercan-Sencicek, K. E. Samocha, A. E. Cicek, M.  
652 T. Murtha, V. H. Bal, S. L. Bishop, S. Dong, A. P. Goldberg, C. Jinlu, J. F. Keaney, L.  
653 Klei, J. D. Mandell, D. Moreno-De-Luca, C. S. Poultney, E. B. Robinson, L. Smith, T.  
654 Solli-Nowlan, M. Y. Su, N. A. Teran, M. F. Walker, D. M. Werling, A. L. Beaudet, R. M.  
655 Cantor, E. Fombonne, D. H. Geschwind, D. E. Grice, C. Lord, J. K. Lowe, S. M. Mane, D.  
656 M. Martin, E. M. Morrow, M. E. Talkowski, J. S. Sutcliffe, C. A. Walsh, T. W. Yu, D. H.  
657 Ledbetter, C. L. Martin, E. H. Cook, J. D. Buxbaum, M. J. Daly, B. Devlin, K. Roeder, M.  
658 W. State, Insights into Autism Spectrum Disorder Genomic Architecture and Biology from  
659 71 Risk Loci. *Neuron*. **87**, 1215–1233 (2015).
- 660 2. J. T. Glessner, J. Li, D. Wang, M. March, L. Lima, A. Desai, D. Hadley, C. Kao, R. E. Gur,  
661 N. Cohen, P. M. A. Sleiman, Q. Li, H. Hakonarson, Copy number variation meta-analysis  
662 reveals a novel duplication at 9p24 associated with multiple neurodevelopmental disorders.  
663 *Genome Med.* **9** (2017), doi:10.1186/s13073-017-0494-1.
- 664 3. A. Robinson-Shelton, B. A. Malow, Sleep Disturbances in Neurodevelopmental Disorders.  
665 *Current Psychiatry Reports*. **18**, 6 (2016).
- 666 4. M. Angriman, B. Caravale, L. Novelli, R. Ferri, O. Bruni, Sleep in Children with  
667 Neurodevelopmental Disabilities. *Neuropediatrics*. **46**, 199–210 (2015).
- 668 5. É. Touchette, D. Petit, J. R. Séguin, M. Boivin, R. E. Tremblay, J. Y. Montplaisir,  
669 *Associations Between Sleep Duration Patterns and Behavioral/Cognitive Functioning at*  
670 *School Entry* (2007);  
671 [https://www.openaire.eu/search/publication?articleId=od\\_\\_\\_\\_\\_267::9fd7f8fedc51f9f1646](https://www.openaire.eu/search/publication?articleId=od_____267::9fd7f8fedc51f9f1646611985a14142d)  
672 [611985a14142d](https://www.openaire.eu/search/publication?articleId=od_____267::9fd7f8fedc51f9f1646611985a14142d)), vol. 30.
- 673 6. S. Cohen, B. D. Fulcher, S. M. W. Rajaratnam, R. Conduit, J. P. Sullivan, M. A. S. Hilaire,  
674 A. J. Phillips, T. Loddenkemper, S. V. Kothare, K. McConnell, W. Ahearn, P. Braga-  
675 Kenyon, A. Shlesinger, J. Potter, F. Bird, K. M. Cornish, S. W. Lockley, Behaviorally-  
676 determined sleep phenotypes are robustly associated with adaptive functioning in  
677 individuals with low functioning autism. *Scientific Reports*. **7**, 1–8 (2017).
- 678 7. G. Stores, Multifactorial Influences, Including Comorbidities, Contributing to Sleep  
679 Disturbance in Children with a Neurodevelopmental Disorder. *CNS Neuroscience &*  
680 *Therapeutics*. **22**, 875–879 (2016).
- 681 8. A. L. Richdale, K. A. Schreck, Sleep problems in autism spectrum disorders: Prevalence,  
682 nature, & possible biopsychosocial aetiologies. *Sleep Medicine Reviews*. **13**, 403–411  
683 (2009).
- 684 9. G. Missig, C. J. McDougle, W. A. Carlezon, Sleep as a translationally-relevant endpoint in  
685 studies of autism spectrum disorder (ASD). *Neuropsychopharmacology*. **45**, 90–103 (2020).
- 686 10. L. Mazzone, V. Postorino, M. Siracusano, A. Riccioni, P. Curatolo, The Relationship  
687 between Sleep Problems, Neurobiological Alterations, Core Symptoms of Autism Spectrum  
688 Disorder, and Psychiatric Comorbidities. *Journal of Clinical Medicine*. **7**, 102 (2018).

- 689 11. M. G. Frank, in *Progress in Brain Research*, E. J. W. Van Someren, Y. D. Van Der Werf,  
690 P. R. Roelfsema, H. D. Mansvelder, F. H. Lopes Da Silva, Eds. (Elsevier, 2011;  
691 <http://www.sciencedirect.com/science/article/pii/B9780444538390000144>), vol. 193 of  
692 *Slow Brain Oscillations of Sleep, Resting State and Vigilance*, pp. 221–232.
- 693 12. J. E. Zimmerman, N. Naidoo, D. M. Raizen, A. I. Pack, Conservation of sleep: insights  
694 from non-mammalian model systems. *Trends in Neurosciences*. **31**, 371–376 (2008).
- 695 13. R. Deuring, L. Fanti, J. A. Armstrong, M. Sarte, O. Papoulas, M. Prestel, G. Daubresse, M.  
696 Verardo, S. L. Moseley, M. Berloco, T. Tsukiyama, C. Wu, S. Pimpinelli, J. W. Tamkun,  
697 The ISWI chromatin-remodeling protein is required for gene expression and the  
698 maintenance of higher order chromatin structure in vivo. *Mol Cell*. **5**, 355–365 (2000).
- 699 14. D. F. V. Corona, G. Siriaco, J. A. Armstrong, N. Snarskaya, S. A. McClymont, M. P. Scott,  
700 J. W. Tamkun, ISWI Regulates Higher-Order Chromatin Structure and Histone H1  
701 Assembly In Vivo. *PLOS Biology*. **5**, e232 (2007).
- 702 15. W. Arancio, M. C. Onorati, G. Burgio, M. Collesano, A. M. R. Ingrassia, S. I. Genovese,  
703 M. Fanto, D. F. V. Corona, The Nucleosome Remodeling Factor ISWI Functionally  
704 Interacts With an Evolutionarily Conserved Network of Cellular Factors. *Genetics*. **185**,  
705 129–140 (2010).
- 706 16. D. J. Yip, C. P. Corcoran, M. Alvarez-Saavedra, A. DeMaria, S. Rennick, A. J. Mears, M.  
707 A. Rudnicki, C. Messier, D. J. Picketts, Snf2l regulates Foxg1-dependent progenitor cell  
708 expansion in the developing brain. *Dev Cell*. **22**, 871–878 (2012).
- 709 17. M. Alvarez-Saavedra, Y. D. Repentigny, P. S. Lagali, E. V. R. Ram, K. Yan, E. Hashem, D.  
710 Ivanochko, M. S. Huh, D. Yang, A. J. Mears, M. A. Todd, C. P. Corcoran, E. A. Bassett, N.  
711 J. Tokarew, J. Kokavec, R. Majumder, I. Ioshikhes, V. A. Wallace, R. Kothary, E.  
712 Meshorer, T. Stopka, A. I. Skoultschi, D. J. Picketts, Snf2h-mediated chromatin organization  
713 and histone H1 dynamics govern cerebellar morphogenesis and neural maturation. *Nat*  
714 *Commun*. **5**, 4181 (2014).
- 715 18. L. R. Goodwin, D. J. Picketts, The role of ISWI chromatin remodeling complexes in brain  
716 development and neurodevelopmental disorders. *Mol Cell Neurosci*. **87**, 55–64 (2018).
- 717 19. E. Karaca, T. Harel, D. Pehlivan, S. N. Jhangiani, T. Gambin, Z. Coban Akdemir, C.  
718 Gonzaga-Jauregui, S. Erdin, Y. Bayram, I. M. Campbell, J. V. Hunter, M. M. Atik, H.  
719 Van Esch, B. Yuan, W. Wiszniewski, S. Isikay, G. Yesil, O. O. Yuregir, S. Tug Bozdogan,  
720 H. Aslan, H. Aydin, T. Tos, A. Aksoy, D. C. De Vivo, P. Jain, B. B. Geckinli, O. Sezer, D.  
721 Gul, B. Durmaz, O. Cogulu, F. Ozkinay, V. Topcu, S. Candan, A. H. Cebi, M. Ikbali, E.  
722 Yilmaz Gulec, A. Gezdirici, E. Koparir, F. Ekici, S. Coskun, S. Cicek, K. Karaer, A.  
723 Koparir, M. B. Duz, E. Kirat, E. Fenercioglu, H. Ulucan, M. Seven, T. Guran, N. Elcioglu,  
724 M. S. Yildirim, D. Aktas, M. Alikasifoğlu, M. Ture, T. Yakut, J. D. Overton, A. Yuksel, M.  
725 Ozen, D. M. Muzny, D. R. Adams, E. Boerwinkle, W. K. Chung, R. A. Gibbs, J. R. Lupski,  
726 Genes that Affect Brain Structure and Function Identified by Rare Variant Analyses of  
727 Mendelian Neurologic Disease. *Neuron*. **88**, 499–513 (2015).

- 728 20. F. Lopes, M. Barbosa, A. Ameer, G. Soares, J. de Sá, A. I. Dias, G. Oliveira, P. Cabral, T.  
729 Temudo, E. Calado, I. F. Cruz, J. P. Vieira, R. Oliveira, S. Esteves, S. Sauer, I. Jonasson,  
730 A.-C. Syvänen, U. Gyllensten, D. Pinto, P. Maciel, Identification of novel genetic causes of  
731 Rett syndrome-like phenotypes. *Journal of Medical Genetics*. **53**, 190–199 (2016).
- 732 21. O. R. Homann, K. Misura, E. Lamas, R. W. Sandrock, P. Nelson, S. I. McDonough, L. E.  
733 DeLisi, Whole-genome sequencing in multiplex families with psychoses reveals mutations  
734 in the SHANK2 and SMARCA1 genes segregating with illness. *Molecular Psychiatry*. **21**,  
735 1690–1695 (2016).
- 736 22. N. Krumm, B. J. O’Roak, J. Shendure, E. E. Eichler, A de novo convergence of autism  
737 genetics and molecular neuroscience. *Trends in Neurosciences*. **37**, 95–105 (2014).
- 738 23. M. Gabriele, A. Lopez Tobon, G. D’Agostino, G. Testa, The chromatin basis of  
739 neurodevelopmental disorders: Rethinking dysfunction along the molecular and temporal  
740 axes. *Progress in Neuro-Psychopharmacology and Biological Psychiatry*. **84**, 306–327  
741 (2018).
- 742 24. M. Perino, G. J. C. Veenstra, Chromatin Control of Developmental Dynamics and  
743 Plasticity. *Developmental Cell*. **38**, 610–620 (2016).
- 744 25. P. J. Shaw, C. Cirelli, R. J. Greenspan, G. Tononi, Correlates of Sleep and Waking in  
745 *Drosophila melanogaster*. *Science*. **287**, 1834–1837 (2000).
- 746 26. J. C. Hendricks, S. M. Finn, K. A. Panckeri, J. Chavkin, J. A. Williams, A. Sehgal, A. I.  
747 Pack, Rest in *Drosophila* is a sleep-like state. *Neuron*. **25**, 129–138 (2000).
- 748 27. S. J. Sanders, M. T. Murtha, A. R. Gupta, J. D. Murdoch, M. J. Raubeson, A. J. Willsey, A.  
749 G. Ercan-Sencicek, N. M. DiLullo, N. N. Parikshak, J. L. Stein, M. F. Walker, G. T. Ober,  
750 N. A. Teran, Y. Song, P. El-Fishawy, R. C. Murtha, M. Choi, J. D. Overton, R. D.  
751 Bjornson, N. J. Carriero, K. A. Meyer, K. Bilguvar, S. M. Mane, N. Sestan, R. P. Lifton, M.  
752 Günel, K. Roeder, D. H. Geschwind, B. Devlin, M. W. State, De novo mutations revealed  
753 by whole-exome sequencing are strongly associated with autism. *Nature*. **485**, 237–241  
754 (2012).
- 755 28. M. R. Johnson, K. Shkura, S. R. Langley, A. Delahaye-Duriez, P. Srivastava, W. D. Hill, O.  
756 J. L. Rackham, G. Davies, S. E. Harris, A. Moreno-Moral, M. Rotival, D. Speed, S.  
757 Petrovski, A. Katz, C. Hayward, D. J. Porteous, B. H. Smith, S. Padmanabhan, L. J.  
758 Hocking, J. M. Starr, D. C. Liewald, A. Visconti, M. Falchi, L. Bottolo, T. Rossetti, B.  
759 Danis, M. Mazzuferi, P. Foerch, A. Grote, C. Helmstaedter, A. J. Becker, R. M. Kaminski,  
760 I. J. Deary, E. Petretto, Systems genetics identifies a convergent gene network for cognition  
761 and neurodevelopmental disease. *Nature Neuroscience*. **19**, 223–232 (2016).
- 762 29. E. Hannon, H. Spiers, J. Viana, R. Pidsley, J. Burrage, T. M. Murphy, C. Troakes, G.  
763 Turecki, M. C. O’Donovan, L. C. Schalkwyk, N. J. Bray, J. Mill, Methylation QTLs in the  
764 developing brain and their enrichment in schizophrenia risk loci. *Nature Neuroscience*. **19**,  
765 48–54 (2016).

- 766 30. C. Carmassi, L. Palagini, D. Caruso, I. Masci, L. Nobili, A. Vita, L. Dell’Osso, Systematic  
767 Review of Sleep Disturbances and Circadian Sleep Desynchronization in Autism Spectrum  
768 Disorder: Toward an Integrative Model of a Self-Reinforcing Loop. *Front. Psychiatry*. **10**  
769 (2019), doi:10.3389/fpsy.2019.00366.
- 770 31. E. M. Barendse, M. P. Hendriks, J. F. Jansen, W. H. Backes, P. A. Hofman, G. Thoonen, R.  
771 P. Kessels, A. P. Aldenkamp, Working memory deficits in high-functioning adolescents  
772 with autism spectrum disorders: neuropsychological and neuroimaging correlates. *J*  
773 *Neurodev Disord*. **5**, 14 (2013).
- 774 32. T. Abel, R. Havekes, J. M. Saletin, M. P. Walker, Sleep, Plasticity and Memory from  
775 Molecules to Whole-Brain Networks. *Current Biology*. **23**, R774–R788 (2013).
- 776 33. L. A. Henry, How does the severity of a learning disability affect working memory  
777 performance? *Memory*. **9**, 233–247 (2001).
- 778 34. A. Hronis, L. Roberts, I. I. Kneebone, A review of cognitive impairments in children with  
779 intellectual disabilities: Implications for cognitive behaviour therapy. *British Journal of*  
780 *Clinical Psychology*. **56**, 189–207 (2017).
- 781 35. K. Schuchardt, M. Gebhardt, C. Mäehler, Working memory functions in children with  
782 different degrees of intellectual disability. *Journal of Intellectual Disability Research*. **54**,  
783 346–353 (2010).
- 784 36. S. E. Gathercole, T. P. Alloway, Practitioner Review: Short-term and working memory  
785 impairments in neurodevelopmental disorders: diagnosis and remedial support. *Journal of*  
786 *Child Psychology and Psychiatry*. **47**, 4–15 (2006).
- 787 37. K. C. J. Nixon, J. Rousseau, M. H. Stone, M. Sarikahya, S. Ehresmann, S. Mizuno, N.  
788 Matsumoto, N. Miyake, DDD Study, D. Baralle, S. McKee, K. Izumi, A. L. Ritter, S.  
789 Heide, D. Héron, C. Depienne, H. Titheradge, J. M. Kramer, P. M. Campeau, A Syndromic  
790 Neurodevelopmental Disorder Caused by Mutations in SMARCD1, a Core SWI/SNF  
791 Subunit Needed for Context-Dependent Neuronal Gene Regulation in Flies. *Am. J. Hum.*  
792 *Genet*. **104**, 596–610 (2019).
- 793 38. P. Masek, K. Worden, Y. Aso, G. M. Rubin, A. C. Keene, A dopamine-modulated neural  
794 circuit regulating aversive taste memory in *Drosophila*. *Curr Biol*. **25**, 1535–1541 (2015).
- 795 39. W. J. Joiner, A. Crocker, B. H. White, A. Sehgal, Sleep in *Drosophila* is regulated by adult  
796 mushroom bodies. *Nature*. **441**, 757–760 (2006).
- 797 40. D. Sitaraman, Y. Aso, X. Jin, N. Chen, M. Felix, G. M. Rubin, M. N. Nitabach, Propagation  
798 of Homeostatic Sleep Signals by Segregated Synaptic Microcircuits of the *Drosophila*  
799 Mushroom Body. *Current Biology*. **25**, 2915–2927 (2015).
- 800 41. J. B. Duffy, GAL4 system in *Drosophila*: a fly geneticist’s Swiss army knife. *Genesis*. **34**,  
801 1–15 (2002).

- 802 42. A. F. Simon, M.-T. Chou, E. D. Salazar, T. Nicholson, N. Saini, S. Metchev, D. E. Krantz,  
803 A simple assay to study social behavior in *Drosophila*: measurement of social space within  
804 a group1. *Genes, Brain and Behavior*. **11**, 243–252 (2012).
- 805 43. S. E. McGuire, Z. Mao, R. L. Davis, Spatiotemporal Gene Expression Targeting with the  
806 TARGET and Gene-Switch Systems in *Drosophila*. *Sci. STKE*. **2004**, pl6–pl6 (2004).
- 807 44. M. Szuperak, M. A. Churgin, A. J. Borja, D. M. Raizen, C. Fang-Yen, M. S. Kayser, A  
808 sleep state in *Drosophila* larvae required for neural stem cell proliferation. *eLife*. **7**, e33220  
809 (2018).
- 810 45. S. Robinow, K. White, Characterization and spatial distribution of the ELAV protein during  
811 *Drosophila melanogaster* development. *Journal of Neurobiology*. **22**, 443–461 (1991).
- 812 46. C. Berger, S. Renner, K. Lüer, G. M. Technau, The commonly used marker ELAV is  
813 transiently expressed in neuroblasts and glial cells in the *Drosophila* embryonic CNS. *Dev.*  
814 *Dyn*. **236**, 3562–3568 (2007).
- 815 47. K. Ito, W. Awano, K. Suzuki, Y. Hiromi, D. Yamamoto, The *Drosophila* mushroom body is  
816 a quadruple structure of clonal units each of which contains a virtually identical set of  
817 neurons and glial cells. *Development*. **124**, 761–771 (1997).
- 818 48. J. Q. Boone, C. Q. Doe, Identification of *Drosophila* type II neuroblast lineages containing  
819 transit amplifying ganglion mother cells. *Developmental Neurobiology*. **68**, 1185–1195  
820 (2008).
- 821 49. O. A. Bayraktar, J. Q. Boone, M. L. Drummond, C. Q. Doe, *Drosophila* type II neuroblast  
822 lineages keep Prospero levels low to generate large clones that contribute to the adult brain  
823 central complex. *Neural Dev*. **5**, 26 (2010).
- 824 50. L. F. Sullivan, T. L. Warren, C. Q. Doe, Temporal identity establishes columnar neuron  
825 morphology, connectivity, and function in a *Drosophila* navigation circuit. *eLife*. **8**, e43482  
826 (2019).
- 827 51. J. M. Donlea, M. S. Thimgan, Y. Suzuki, L. Gottschalk, P. J. Shaw, Inducing sleep by  
828 remote control facilitates memory consolidation in *Drosophila*. *Science*. **332**, 1571–1576  
829 (2011).
- 830 52. J. M. Donlea, D. Pimentel, G. Miesenbock, Neuronal Machinery of Sleep Homeostasis in  
831 *Drosophila*. *Neuron*. **81**, 1442 (2014).
- 832 53. Y. Qian, Y. Cao, B. Deng, G. Yang, J. Li, R. Xu, D. zhang, J. Huang, Y. Rao, Sleep  
833 homeostasis regulated by 5HT2b receptor in a small subset of neurons in the dorsal fan-  
834 shaped body of *drosophila*. *eLife*. **6**, e26519 (2017).
- 835 54. L. Chakravarti Dilley, M. Szuperak, N. N. Gong, C. E. Williams, R. L. Saldana, D. S.  
836 Garbe, M. H. Syed, R. Jain, M. S. Kayser, Identification of a molecular basis for the  
837 juvenile sleep state. *eLife*. **9**, e52676 (2020).



- 838 55. F. N. Hamada, M. Rosenzweig, K. Kang, S. R. Pulver, A. Ghezzi, T. J. Jegla, P. A. Garrity,  
839 An internal thermal sensor controlling temperature preference in *Drosophila*. *Nature*. **454**,  
840 217–220 (2008).
- 841 56. C. S. Greene, A. Krishnan, A. K. Wong, E. Ricciotti, R. A. Zelaya, D. S. Himmelstein, R.  
842 Zhang, B. M. Hartmann, E. Zaslavsky, S. C. Sealton, D. I. Chasman, G. A. FitzGerald, K.  
843 Dolinski, T. Grosser, O. G. Troyanskaya, Understanding multicellular function and disease  
844 with human tissue-specific networks. *Nature Genetics*. **47**, 569–576 (2015).
- 845 57. A. Krishnan, R. Zhang, V. Yao, C. L. Theesfeld, A. K. Wong, A. Tadych, N. Volfovsky, A.  
846 Packer, A. Lash, O. G. Troyanskaya, Genome-wide prediction and functional  
847 characterization of the genetic basis of autism spectrum disorder. *Nature Neuroscience*. **19**,  
848 1454–1462 (2016).
- 849 58. J. E. Jan, R. J. Reiter, M. C. Bax, U. Ribary, R. D. Freeman, M. B. Wasdell, Long-term  
850 sleep disturbances in children: a cause of neuronal loss. *Eur J Paediatr Neurol*. **14**, 380–  
851 390 (2010).
- 852 59. M. Nishiyama, K. Oshikawa, Y. Tsukada, T. Nakagawa, S. Iemura, T. Natsume, Y. Fan, A.  
853 Kikuchi, A. I. Skoultchi, K. I. Nakayama, CHD8 suppresses p53-mediated apoptosis  
854 through histone H1 recruitment during early embryogenesis. *Nat. Cell Biol.* **11**, 172–182  
855 (2009).
- 856 60. M. Nishiyama, A. I. Skoultchi, K. I. Nakayama, Histone H1 recruitment by CHD8 is  
857 essential for suppression of the Wnt- $\beta$ -catenin signaling pathway. *Mol. Cell. Biol.* **32**, 501–  
858 512 (2012).
- 859 61. T. Batsukh, L. Pieper, A. M. Koszucka, N. von Velsen, S. Hoyer-Fender, M. Elbracht, J. E.  
860 H. Bergman, L. H. Hoefsloot, S. Pauli, CHD8 interacts with CHD7, a protein which is  
861 mutated in CHARGE syndrome. *Hum. Mol. Genet.* **19**, 2858–2866 (2010).
- 862 62. J. Cotney, R. A. Muhle, S. J. Sanders, L. Liu, A. J. Willsey, W. Niu, W. Liu, L. Klei, J. Lei,  
863 J. Yin, S. K. Reilly, A. T. Tebbenkamp, C. Bichsel, M. Pletikos, N. Sestan, K. Roeder, M.  
864 W. State, B. Devlin, J. P. Noonan, The autism-associated chromatin modifier CHD8  
865 regulates other autism risk genes during human neurodevelopment. *Nature*  
866 *Communications*. **6**, 6404 (2015).
- 867 63. H.-H. Li, J. R. Kroll, S. M. Lennox, O. Ogundeyi, J. Jeter, G. Depasquale, J. W. Truman, A  
868 GAL4 Driver Resource for Developmental and Behavioral Studies on the Larval CNS of  
869 *Drosophila*. *Cell Reports*. **8**, 897–908 (2014).
- 870 64. L. A. Perkins, L. Holderbaum, R. Tao, Y. Hu, R. Sopko, K. McCall, D. Yang-Zhou, I.  
871 Flockhart, R. Binari, H.-S. Shim, A. Miller, A. Housden, M. Foos, S. Randkely, C. Kelley,  
872 P. Namgyal, C. Villalta, L.-P. Liu, X. Jiang, Q. Huan-Huan, X. Wang, A. Fujiyama, A.  
873 Toyoda, K. Ayers, A. Blum, B. Czech, R. Neumuller, D. Yan, A. Cavallaro, K. Hibbard, D.  
874 Hall, L. Cooley, G. J. Hannon, R. Lehmann, A. Parks, S. E. Mohr, R. Ueda, S. Kondo, J.-Q.  
875 Ni, N. Perrimon, The Transgenic RNAi Project at Harvard Medical School: Resources and  
876 Validation. *Genetics*. **201**, 843–852 (2015).

- 877 65. B. D. Pfeiffer, A. Jenett, A. S. Hammonds, T.-T. B. Ngo, S. Misra, C. Murphy, A. Scully, J.  
878 W. Carlson, K. H. Wan, T. R. Laverty, C. Mungall, R. Svirskas, J. T. Kadonaga, C. Q. Doe,  
879 M. B. Eisen, S. E. Celniker, G. M. Rubin, Tools for neuroanatomy and neurogenetics in  
880 *Drosophila*. *PNAS*. **105**, 9715–9720 (2008).
- 881 66. G. F. Gilestro, C. Cirelli, pySolo: a complete suite for sleep analysis in *Drosophila*.  
882 *Bioinformatics*. **25**, 1466–1467 (2009).
- 883 67. J.-Q. Ni, R. Zhou, B. Czech, L.-P. Liu, L. Holderbaum, D. Yang-Zhou, H.-S. Shim, R. Tao,  
884 D. Handler, P. Karpowicz, R. Binari, M. Booker, J. Brennecke, L. A. Perkins, G. J.  
885 Hannon, N. Perrimon, A genome-scale shRNA resource for transgenic RNAi in *Drosophila*.  
886 *Nat Methods*. **8**, 405–407 (2011).
- 887 68. R. W. Siegel, J. C. Hall, Conditioned responses in courtship behavior of normal and mutant  
888 *Drosophila*. *Proc. Natl. Acad. Sci. U.S.A.* **76**, 3430–3434 (1979).
- 889 69. Y. Hu, I. Flockhart, A. Vinayagam, C. Bergwitz, B. Berger, N. Perrimon, S. E. Mohr, An  
890 integrative approach to ortholog prediction for disease-focused and other functional studies.  
891 *BMC Bioinformatics*. **12**, 357 (2011).
- 892 70. A. A. Hagberg, D. A. Schult, P. J. Swart, (2008), p. 5.
- 893 71. P. Shannon, A. Markiel, O. Ozier, N. S. Baliga, J. T. Wang, D. Ramage, N. Amin, B.  
894 Schwikowski, T. Ideker, Cytoscape: A Software Environment for Integrated Models of  
895 Biomolecular Interaction Networks. *Genome Res*. **13**, 2498–2504 (2003).
- 896 72. H. Mi, X. Huang, A. Muruganujan, H. Tang, C. Mills, D. Kang, P. D. Thomas, PANTHER  
897 version 11: expanded annotation data from Gene Ontology and Reactome pathways, and  
898 data analysis tool enhancements. *Nucleic Acids Res*. **45**, D183–D189 (2017).
- 899  
900



901 **Acknowledgements:** We thank members of the Kayser lab, Drs. Maja Bucan, Roberto Bonasio,  
902 Thomas Jongens, David Raizen, and members of the Penn Chronobiology and Sleep Institute for  
903 helpful discussions/input, and the Next Generation Sequencing Core (University of  
904 Pennsylvania) for sequencing/analysis support. We thank Dr. Roberto Bonasio for bioinformatic  
905 support in analyzing RNA Seq data. Figure S9a was created with BioRender.com. We thank  
906 Salina Yuan for assistance with creating Figure S9b. **Funding:** This work was supported by NIH  
907 grants K08 NS090461 and DP2 NS111996 to M.S.K., and T32 HL07953 to N.N.G. Additional  
908 funding was from the Burroughs Wellcome Fund, Alfred P. Sloan Foundation, and March of  
909 Dimes to M.S.K., and the Hearst Foundation Fellowship to N.N.G. **Author contributions:**  
910 N.N.G., L.C.D, and M.S.K. conceived the project. N.N.G., L.C.D., E.H.M., and M.S.K. designed  
911 experiments. N.N.G., L.C.D., C.E.W., and M.S. performed experiments and interpreted data.  
912 M.J. and S.G. performed bioinformatic network analysis experiments. T.Y.T., M.A.D., and D.L.  
913 identified patient *SMARCA5* mutations. N.N.G., L.C.D., Q.W., and Y.S. generated *Drosophila*  
914 reagents. N.N.G. and M.S.K. wrote the manuscript, with input from all authors. **Competing**  
915 **interests:** The authors declare that they have no competing interests. **Data and materials**  
916 **availability:** Additional data related to the paper may be requested from the authors.

917 **Fig. 1**

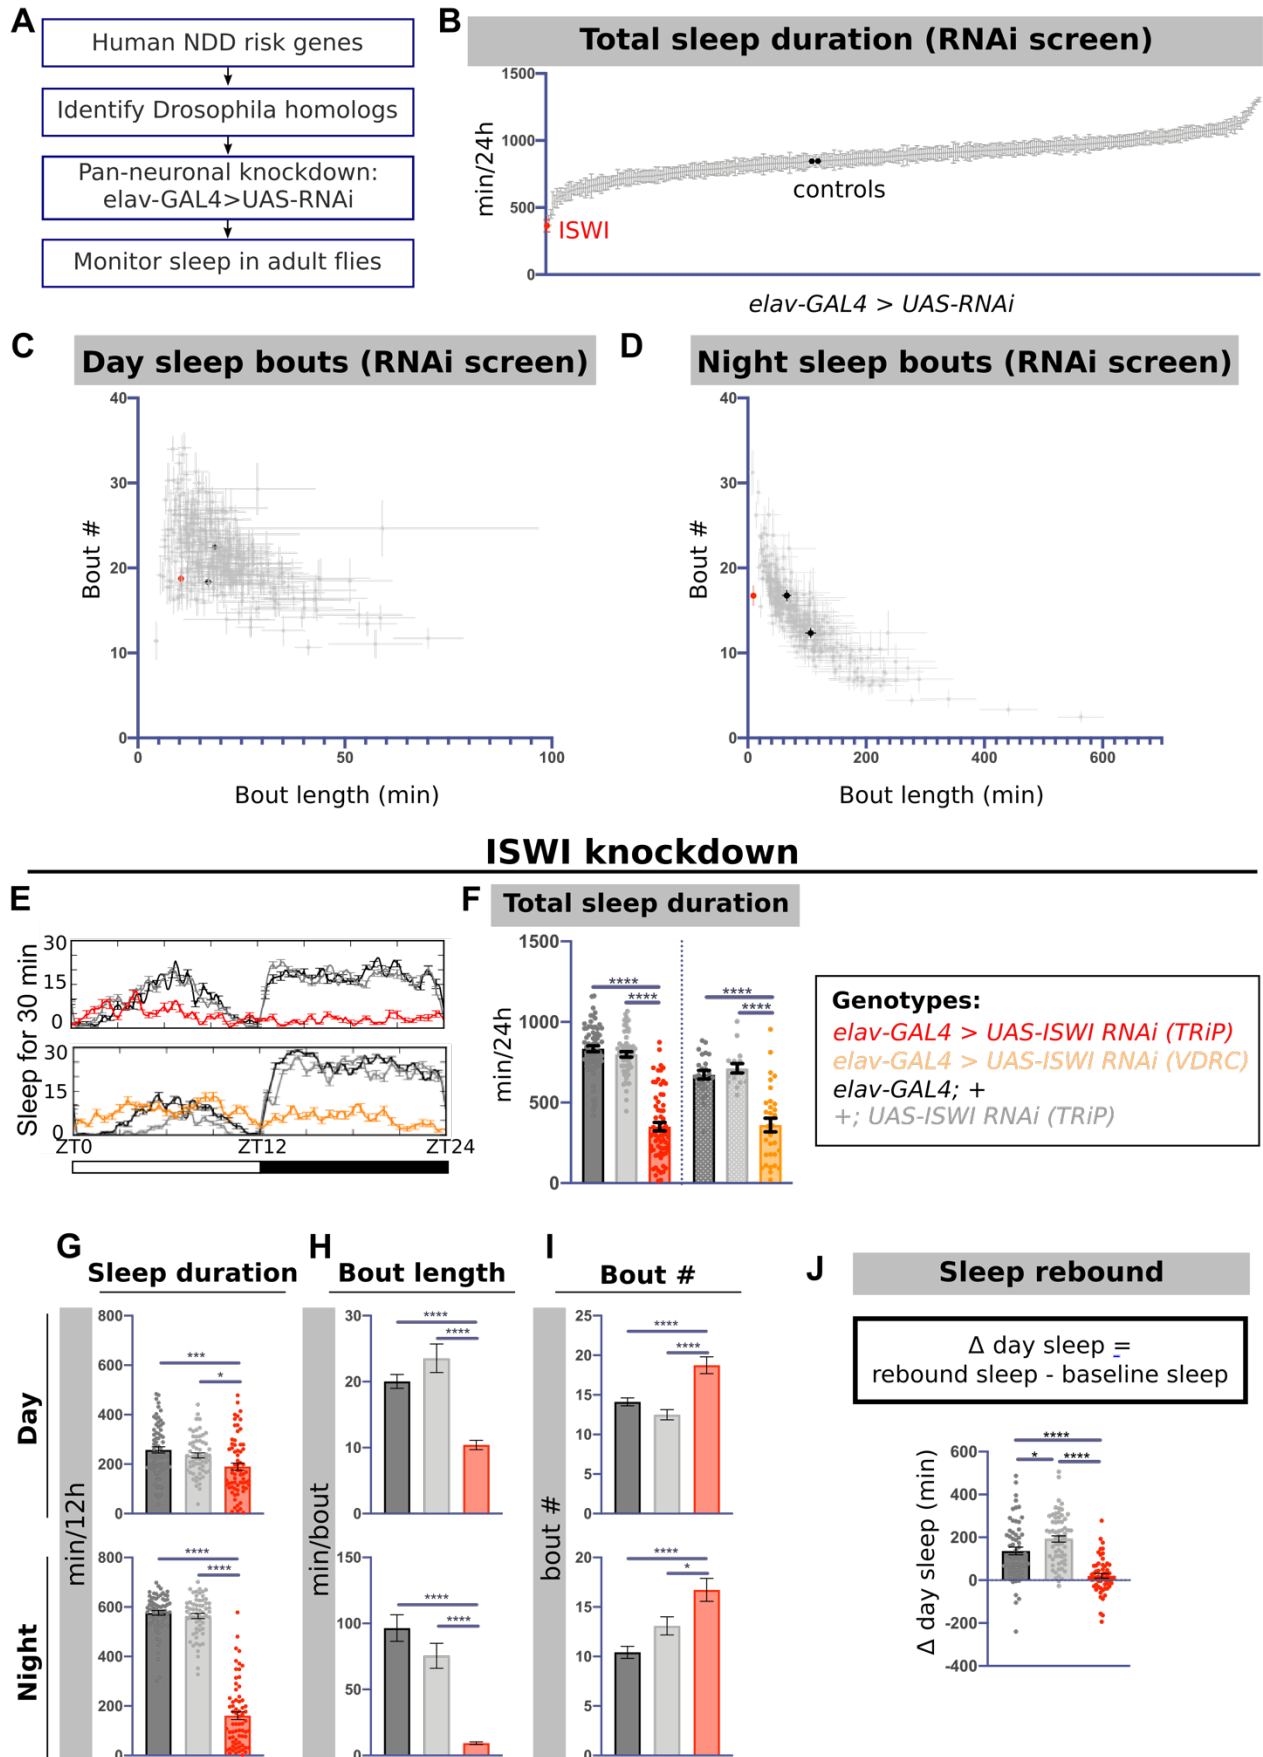

918 **Fig. 1: *ISWI* knockdown results in sleep deficits in adult *Drosophila*.** A) Design of NDD risk  
919 gene sleep screen. B) Total sleep in all viable screened RNAi lines (348 lines,  $n \geq 16$  per RNAi  
920 line). Average sleep bout length and sleep bout number plotted for all lines across the C) day and  
921 D) night. E) Representative sleep traces of genetic controls (black, gray) and pan-neuronal *ISWI*  
922 knockdown with two independent RNAi lines (red, orange). F) Total sleep, G) day and night  
923 sleep, H) average sleep bout length and I) number during the day or night in *ISWI* knockdown  
924 compared to genetic controls ( $n = 70, 61, 68, 24, 16, 31$  for groups from left to right in F). J)  
925 Comparison of differences in rebound and baseline day sleep in *ISWI* knockdown (red) and  
926 genetic controls (gray) ( $n = 63, 65, 61$  from left to right). For graphs in this figure and all other  
927 graphs unless otherwise stated: data are presented as mean  $\pm$  SEM. \* $P < 0.01$ , \*\* $P < 0.01$ , \*\*\* $P$   
928  $< 0.001$ , \*\*\*\* $P < 0.0001$  and analyzed with one-way ANOVA with post-hoc Tukey's multiple  
929 comparison test (B,F-J).

930 Fig. 2

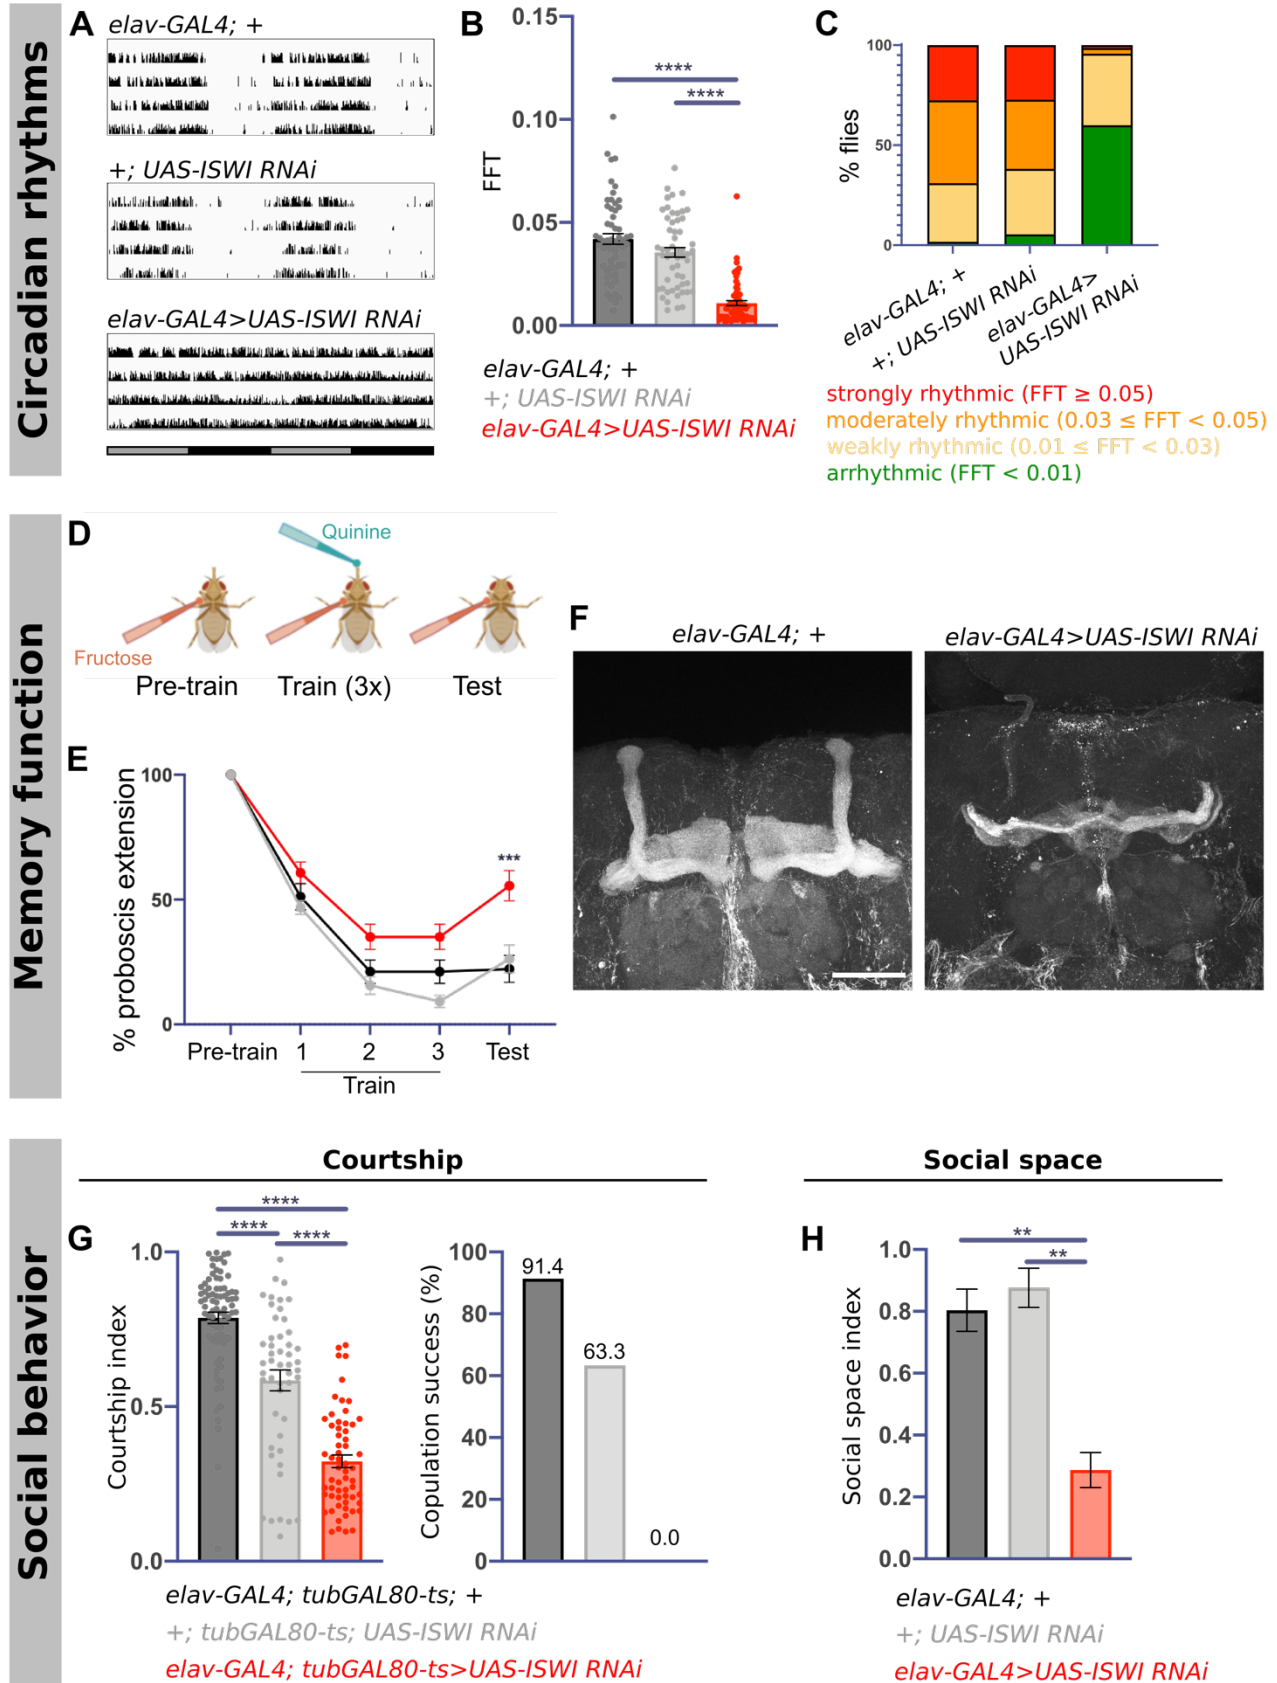

931 **Fig. 2: *ISWI* knockdown results in circadian arrhythmicity, memory deficits, and social**  
932 **dysfunction.** A) Representative actogram traces from individual flies for each genotype. B)  
933 Comparison of rhythm strength in the setting of *ISWI* knockdown (red) and in genetic controls  
934 (black and gray), as measured by FFT (n = 58, 55, and 70 from left to right). C) Proportion of  
935 strongly rhythmic, moderately rhythmic, weakly rhythmic, and arrhythmic flies in the setting of  
936 *ISWI* knockdown and in genetic controls. D) Experimental design of PER. E) Quantification of  
937 proboscis extensions in *ISWI* knockdown (blue, n = 39) compared to genetic controls (black, n =  
938 30; gray, n = 47) (Two-way ANOVA with post-hoc multiple comparison test; asterisks denote  
939 significance of *ISWI* knockdown condition compared to both genetic controls in post-hoc  
940 testing). F) Example FasII staining in controls (left) and *ISWI* knockdown (right). Scale bar,  
941 50um. G) Male courtship indices (left) and copulation success (right) in the setting of *ISWI*  
942 knockdown compared to genetic controls (n = 60, 49, 81 from left to right). H) Social space  
943 index comparison between *ISWI* knockdown and genetic controls (n ≥ 3 replicates per genotype,  
944 40 flies per replicate per genotype) (see Methods for details on calculation of index).

945 Fig. 3

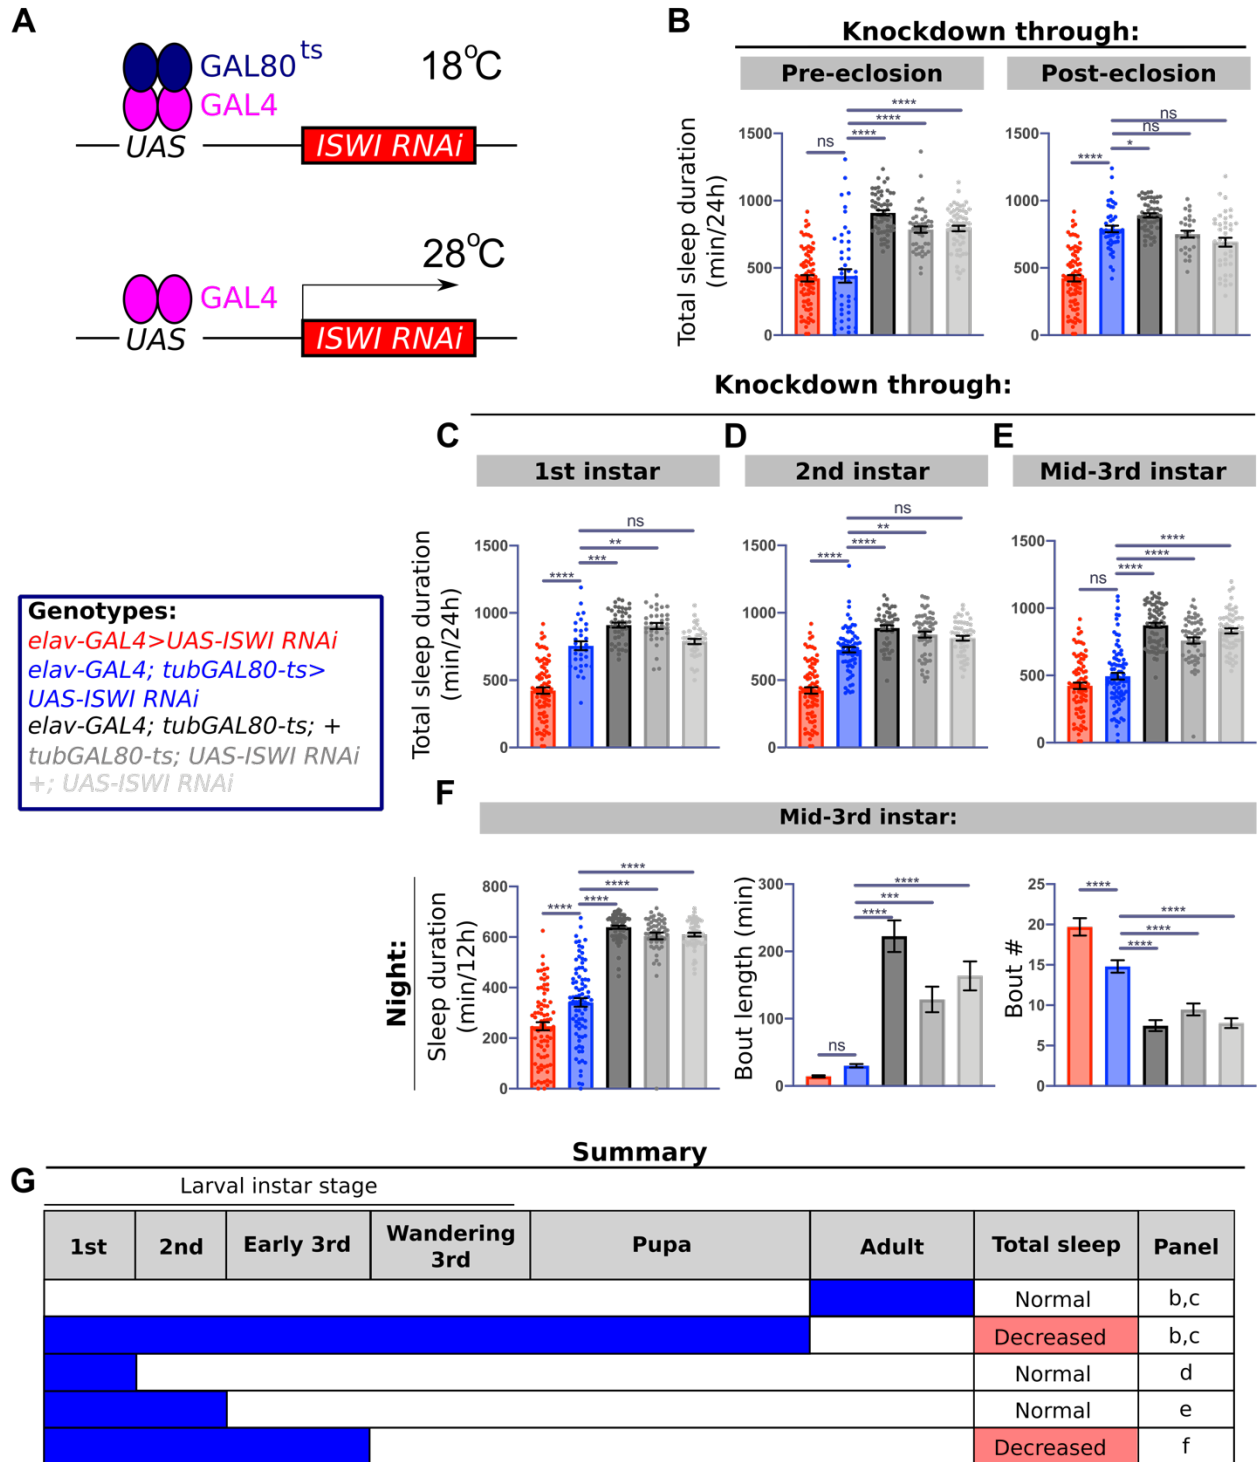

946 **Fig. 3: *ISWI* knockdown through mid-3<sup>rd</sup> instar leads to sleep disruptions.** A) Schematic of  
947 TARGET system. B) Quantification of total sleep duration in the setting of pre- (left) or post-  
948 eclosion (right) *ISWI* knockdown (blue) compared to genetic controls (black and grays) exposed  
949 to the same temperature shifts across development or constitutive knockdown (red) (always at  
950 25°C) (for pre-eclosion: n = 82, 46, 57, 47, 58 from left to right; for post-eclosion: n = 82, 46, 52,  
951 28, 40). Quantification of total sleep duration in the setting of *ISWI* knockdown through C) 1<sup>st</sup>  
952 instar (n = 82, 31, 43, 33, 36, from left to right) and D) 2<sup>nd</sup> instar (n = 82, 69, 46, 57, 50, from left  
953 to right). E) Total sleep duration and F) night sleep duration, sleep bout length, and sleep bout  
954 number (left to right) in the setting of *ISWI* knockdown through mid-3<sup>rd</sup> instar (n = 82, 84, 68,  
955 55, 58, from left to right). G) Summary of *ISWI* knockdown periods and resulting effects on total  
956 sleep duration.

957 Fig. 4

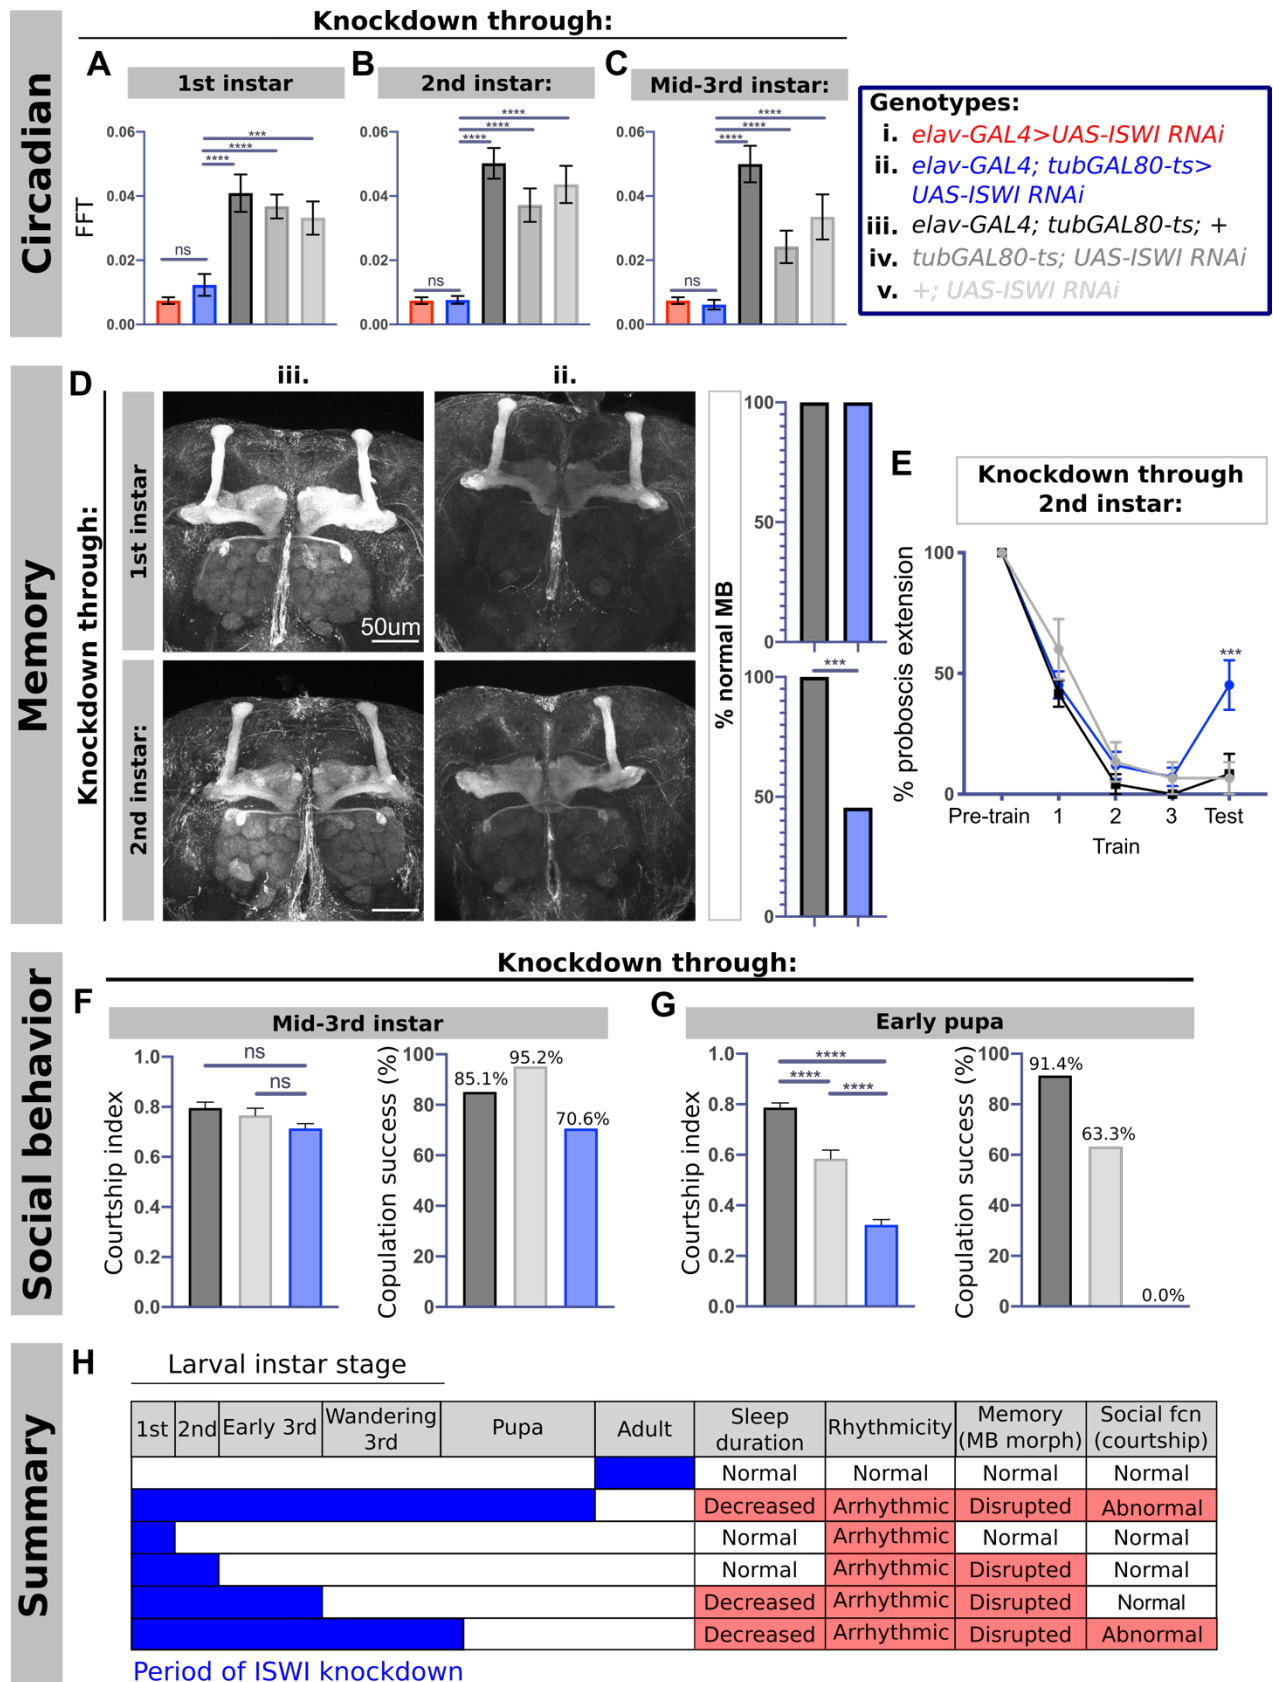



958 **Fig. 4: *ISWI* knockdown during separable developmental windows leads to distinct**  
959 **behavioral phenotypes.** A) Quantification of rhythmicity as measured by maximum FFT  
960 amplitude of temporally restricted *ISWI* knockdown (blue) through B) 1<sup>st</sup>, C) 2<sup>nd</sup>, and D) mid-3<sup>rd</sup>  
961 instars (left to right) compared to constitutive knockdown (red) and genetic controls (black and  
962 grays) (for all *elav* > UAS-*ISWI* RNAi (red), n = 23; from left to right for all other conditions:  
963 knockdown through 1<sup>st</sup> instar, n = 25, 28, 27, 27; knockdown through 2<sup>nd</sup> instar, n = 30, 32, 30,  
964 30; knockdown through mid-3<sup>rd</sup> instar, n = 29, 31, 30, 18). D) Representative images of FasII  
965 immunostaining with *ISWI* knockdown through 1<sup>st</sup> (top) and 2<sup>nd</sup> instars (bottom), with  
966 quantification of percentage of brains with normal MB morphology (for knockdown through 1<sup>st</sup>  
967 instar: n = 12, black; n = 15, blue; for knockdown through 2<sup>nd</sup> instar: n = 21, black; n = 22, blue)  
968 (Fisher's Exact test). E) Quantification of PER assay with temporally-restricted *ISWI* knockdown  
969 through 2<sup>nd</sup> instar (blue; n = 14) compared to genetic controls (black, n = 10 and gray, n = 12)  
970 (Two-way ANOVA with post-hoc multiple comparison test; asterisks denote significance of  
971 *ISWI* knockdown condition compared to both genetic controls in post-hoc testing). (F, G)  
972 Courtship index (left) and copulation success (right) for *ISWI* knockdown through F) mid-3<sup>rd</sup> (n  
973 = 39, 62, 42 from left to right) and G) early pupation (n = 60, 81, 49 from left to right). H)  
974 Summary of windows of *ISWI* knockdown that give rise to different adult phenotypes.



976 **Fig. 5: *ISWI* knockdown in type I neuroblasts leads to sleep disruption and MB**  
977 **morphologic deficits.** A) Representative sleep traces from multibeam sleep monitoring with  
978 *ISWI* knockdown in all neuroblasts using *worniu-GAL4* driver (blue) compared to *elav*-driven  
979 knockdown (red) and genetic controls (black and gray). Quantification of B) total sleep duration,  
980 C) night sleep duration, and D) night sleep bout length in *worniu-GAL4 > UAS-ISWI RNAi* flies  
981 as measured by multibeam monitoring compared to *elav-GAL4 > UAS-ISWI RNAi* and genetic  
982 controls (n = 32, 32, 31, 14 from left to right). E) Representative images of FasII  
983 immunostaining of brains of *worniu-GAL4 > UAS-ISWI RNAi* flies. F) Representative sleep  
984 traces for *ISWI* knockdown in different neuroblast lineages. Quantification of G) total sleep  
985 duration and H) nighttime sleep with *ISWI* knockdown in different neuroblast lineages (from left  
986 to right: type I neuroblasts, n = 42, 43, 43, 42, 47; type II neuroblast lineages, n = 42, 43, 43, 31,  
987 30, 31, 32. Asterisks denote significance compared to both the *GAL4* only control and *UAS-ISWI*  
988 *RNAi* only control). Representative images of FasII immunostaining of brains with *ISWI*  
989 knockdown in I) type I neuroblasts and J) type II neuroblast lineages.

990 Fig. 6

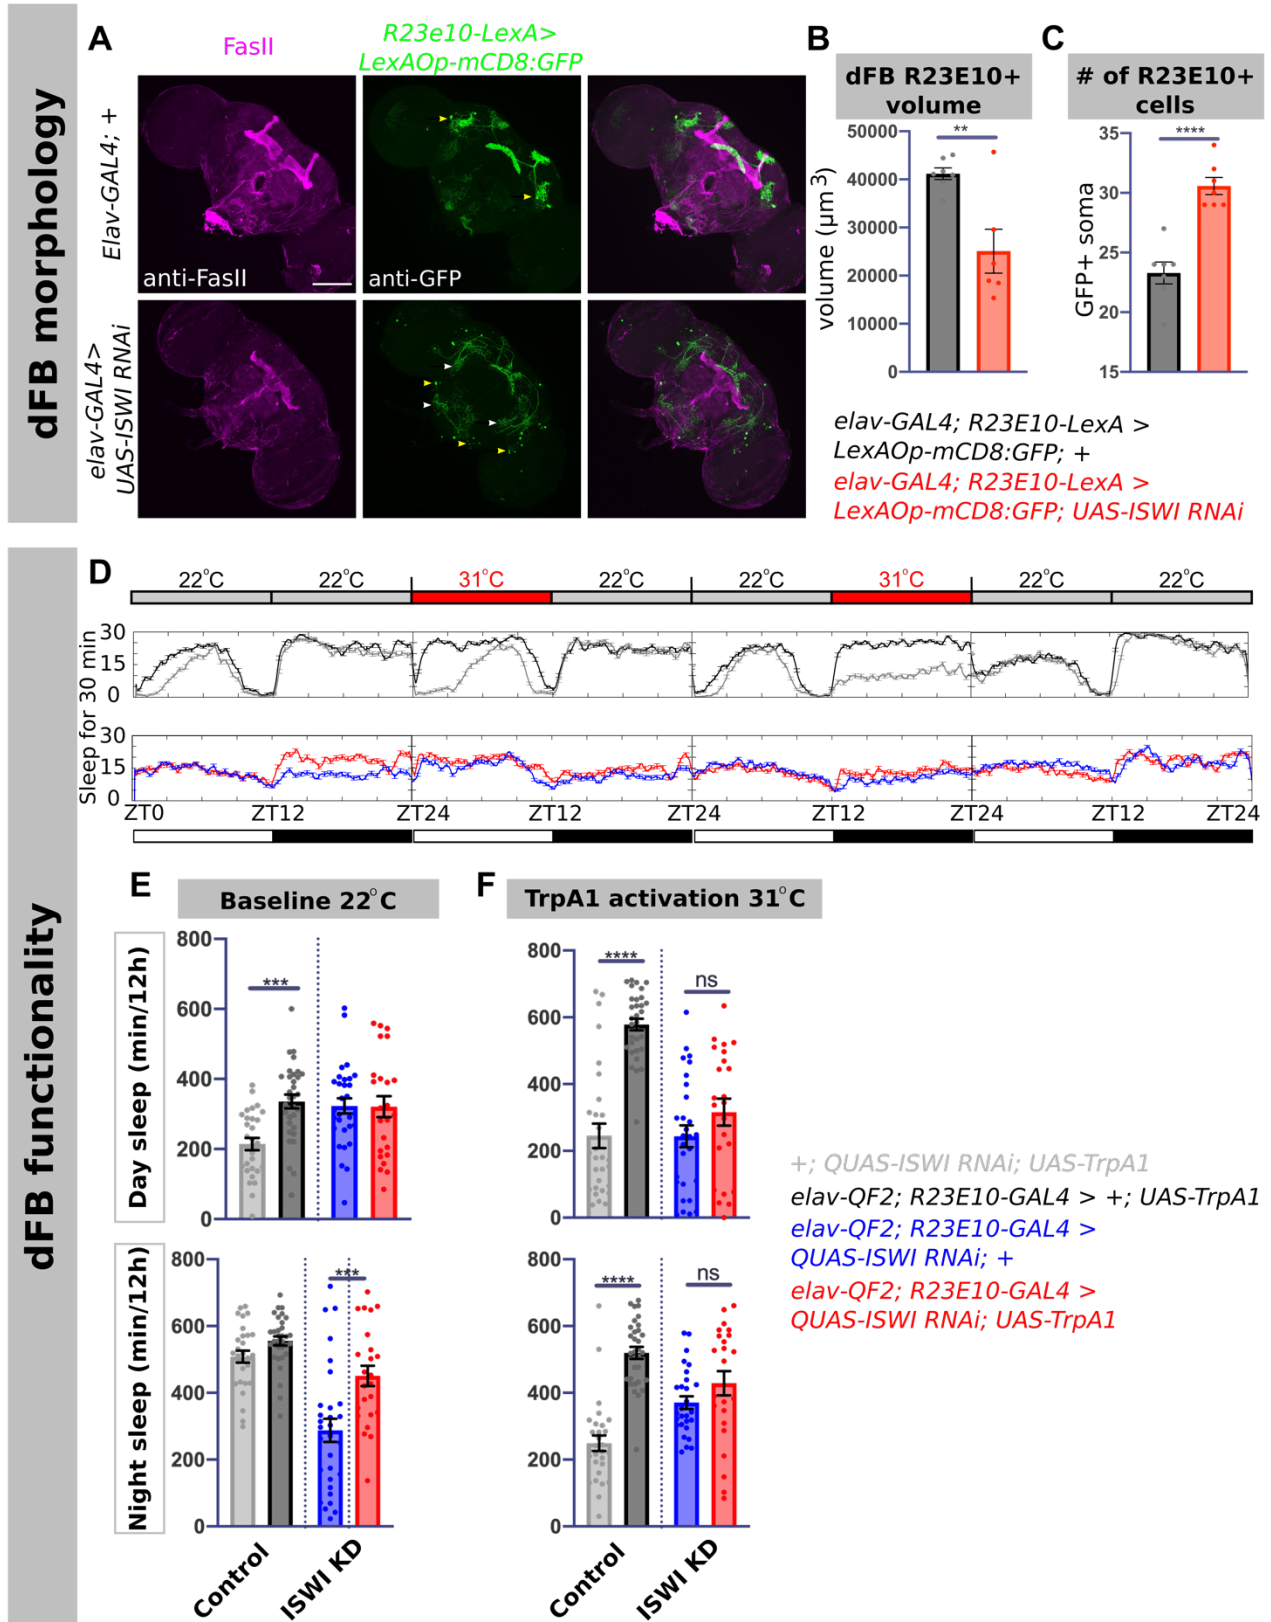

991 **Fig. 6: *ISWI* knockdown disrupts the morphology and function of the sleep-promoting**  
992 **dFB.** A) Representative images of *R23E10* neuron morphology as visualized by GFP staining  
993 (middle panels) in genetic controls (top) and in the setting of *ISWI* knockdown (bottom), with  
994 FasII counterstaining (left panels). White arrowheads point to abnormal *R23E10* neuron  
995 projections, yellow arrowheads indicate normal and aberrant cell body locations in genetic  
996 controls and in the setting of *ISWI* knockdown, respectively. Scale bar, 100um. Quantification of  
997 B) dFB volume and C) number of *R23E10* soma in genetic controls (black, n = 10) and in the  
998 setting of pan-neuronal *ISWI* knockdown (red, n = 15) as measured by GFP immunostaining. D)  
999 Thermogenetic activation of *R23E10* neurons, with experimental design showing temperature  
1000 shifts (top) and representative sleep traces (bottom panels). Quantification of day (top) and night  
1001 (bottom) sleep at E) 22°C baseline and F) sleep in the setting of TrpA1 activation at 31°C across  
1002 all experimental and control groups (n = 32, 29, 24, 30 from left to right).

1003 **Fig. 7**

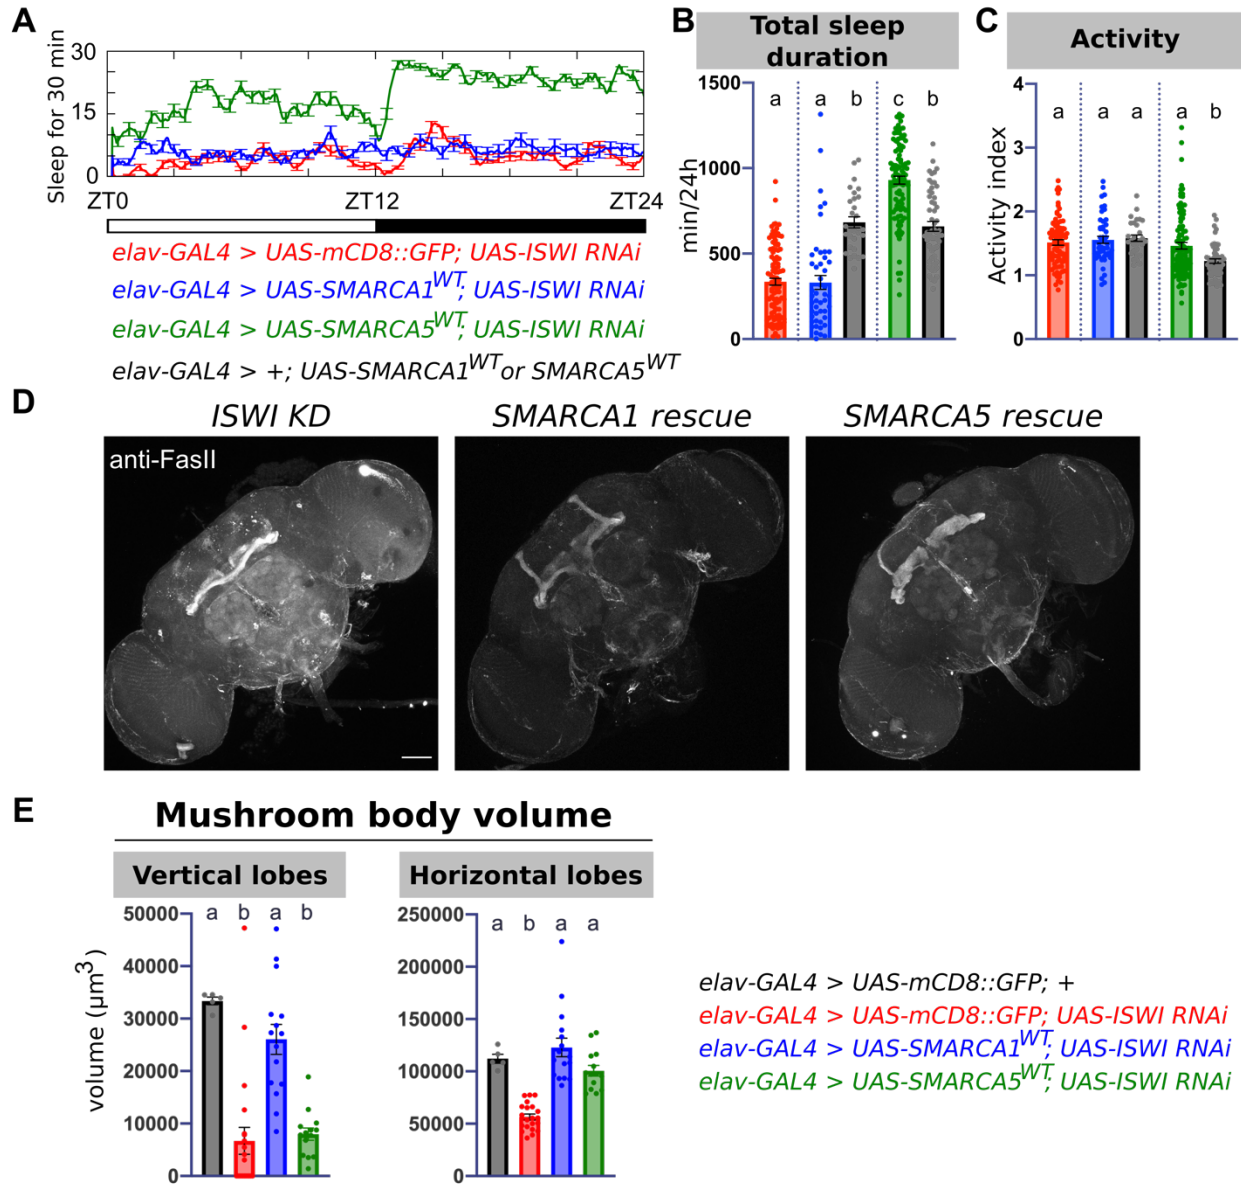

1004 **Fig. 7: The human *ISWI* homologs *SMARCA1* and *SMARCA5* differentially rescue sleep**  
1005 **and MB morphology in the setting of *ISWI* knockdown.** A) Representative sleep traces with  
1006 *ISWI* knockdown (red) compared to *SMARCA1*<sup>WT</sup> (blue) and *SMARCA5*<sup>WT</sup> (green) expression in  
1007 the setting of *ISWI* knockdown, or overexpression alone (black) with B) quantification of total  
1008 sleep and C) activity index across experimental and control groups (n = 104, 48, 29, 102, 55  
1009 from left to right). D) Representative images of FasII immunostaining of adult brains with pan-  
1010 neuronal *ISWI* knockdown (left), *SMARCA1*<sup>WT</sup> rescue (middle), and *SMARCA5*<sup>WT</sup> rescue (right),  
1011 and E) quantification of MB morphology across groups. Volumes are presented as the sum of  
1012 horizontal (left) or vertical (right) lobe volumes by each brain (n = 5, 21, 16, 14 from left to  
1013 right).

## 1014 **Supplementary Materials**



1015 Fig. S1

**ISWI knockdown with second RNAi line**

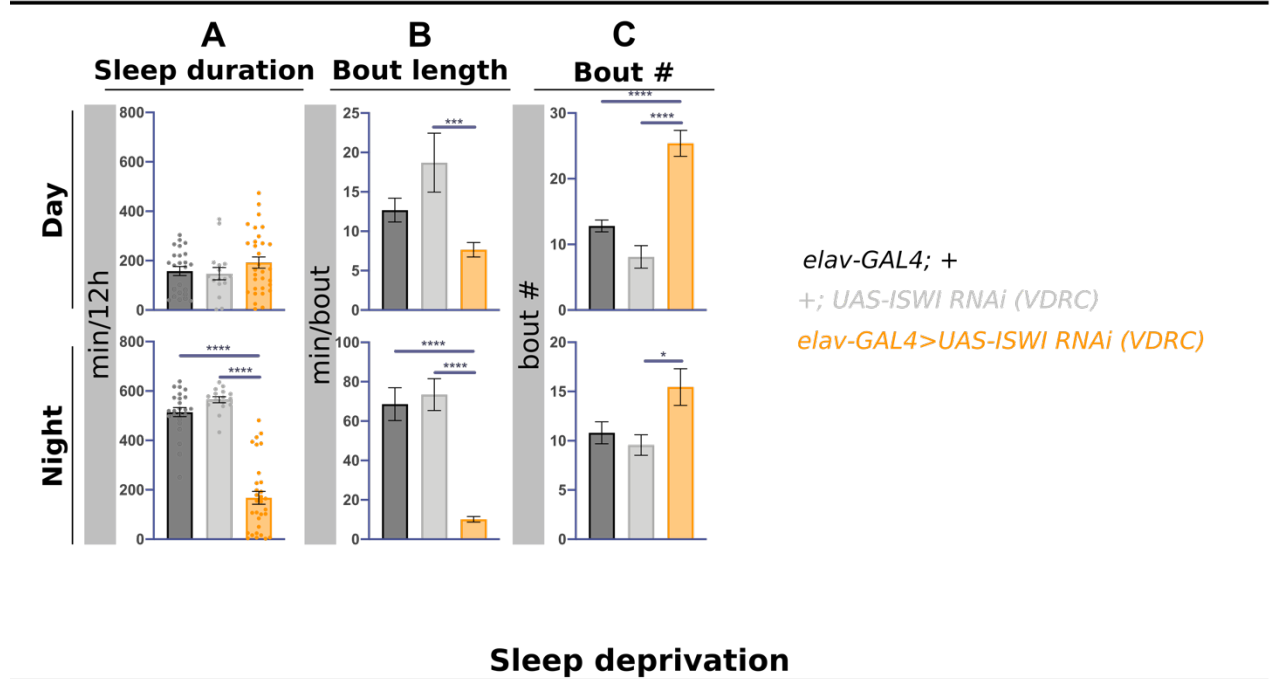

**Sleep deprivation**

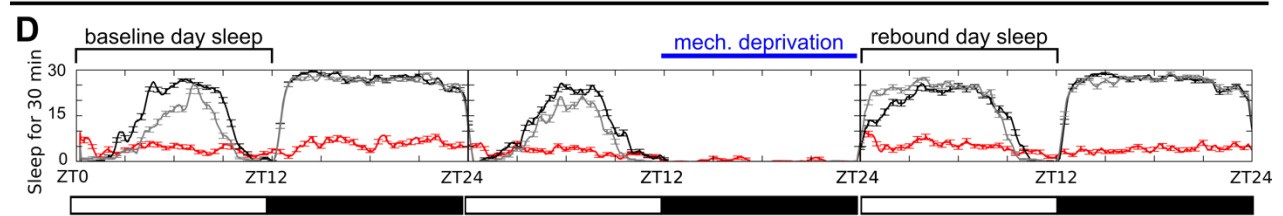

**E Sleep lost**

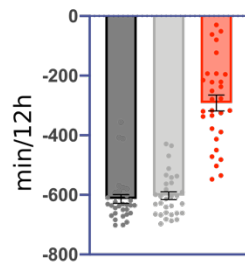

**F Day sleep duration**

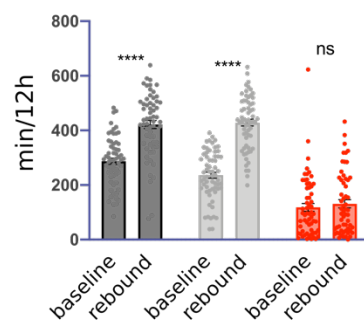

1016 **Fig. S1: Extended characterization of sleep deficits in the setting of *ISWI* knockdown.** Day  
1017 and night average A) sleep duration, B) bout length, and C) bout number the VDRC *ISWI* RNAi  
1018 line (orange) compared to genetic controls (black and gray) (n = 24, 16, 31 from left to right). D)  
1019 Representative sleep traces for mechanical sleep deprivation experiment. E) Nighttime sleep loss  
1020 in minutes during mechanical deprivation compared to baseline nighttime sleep in *ISWI*  
1021 knockdown (red) and genetic controls (black and gray). F) Comparison of baseline day sleep  
1022 before night time mechanical deprivation and rebound day sleep directly following deprivation  
1023 (n = 63, 65, 61 from left to right; mixed model ANOVA with post-hoc Tukey's multiple  
1024 comparison test).

1025 Fig. S2

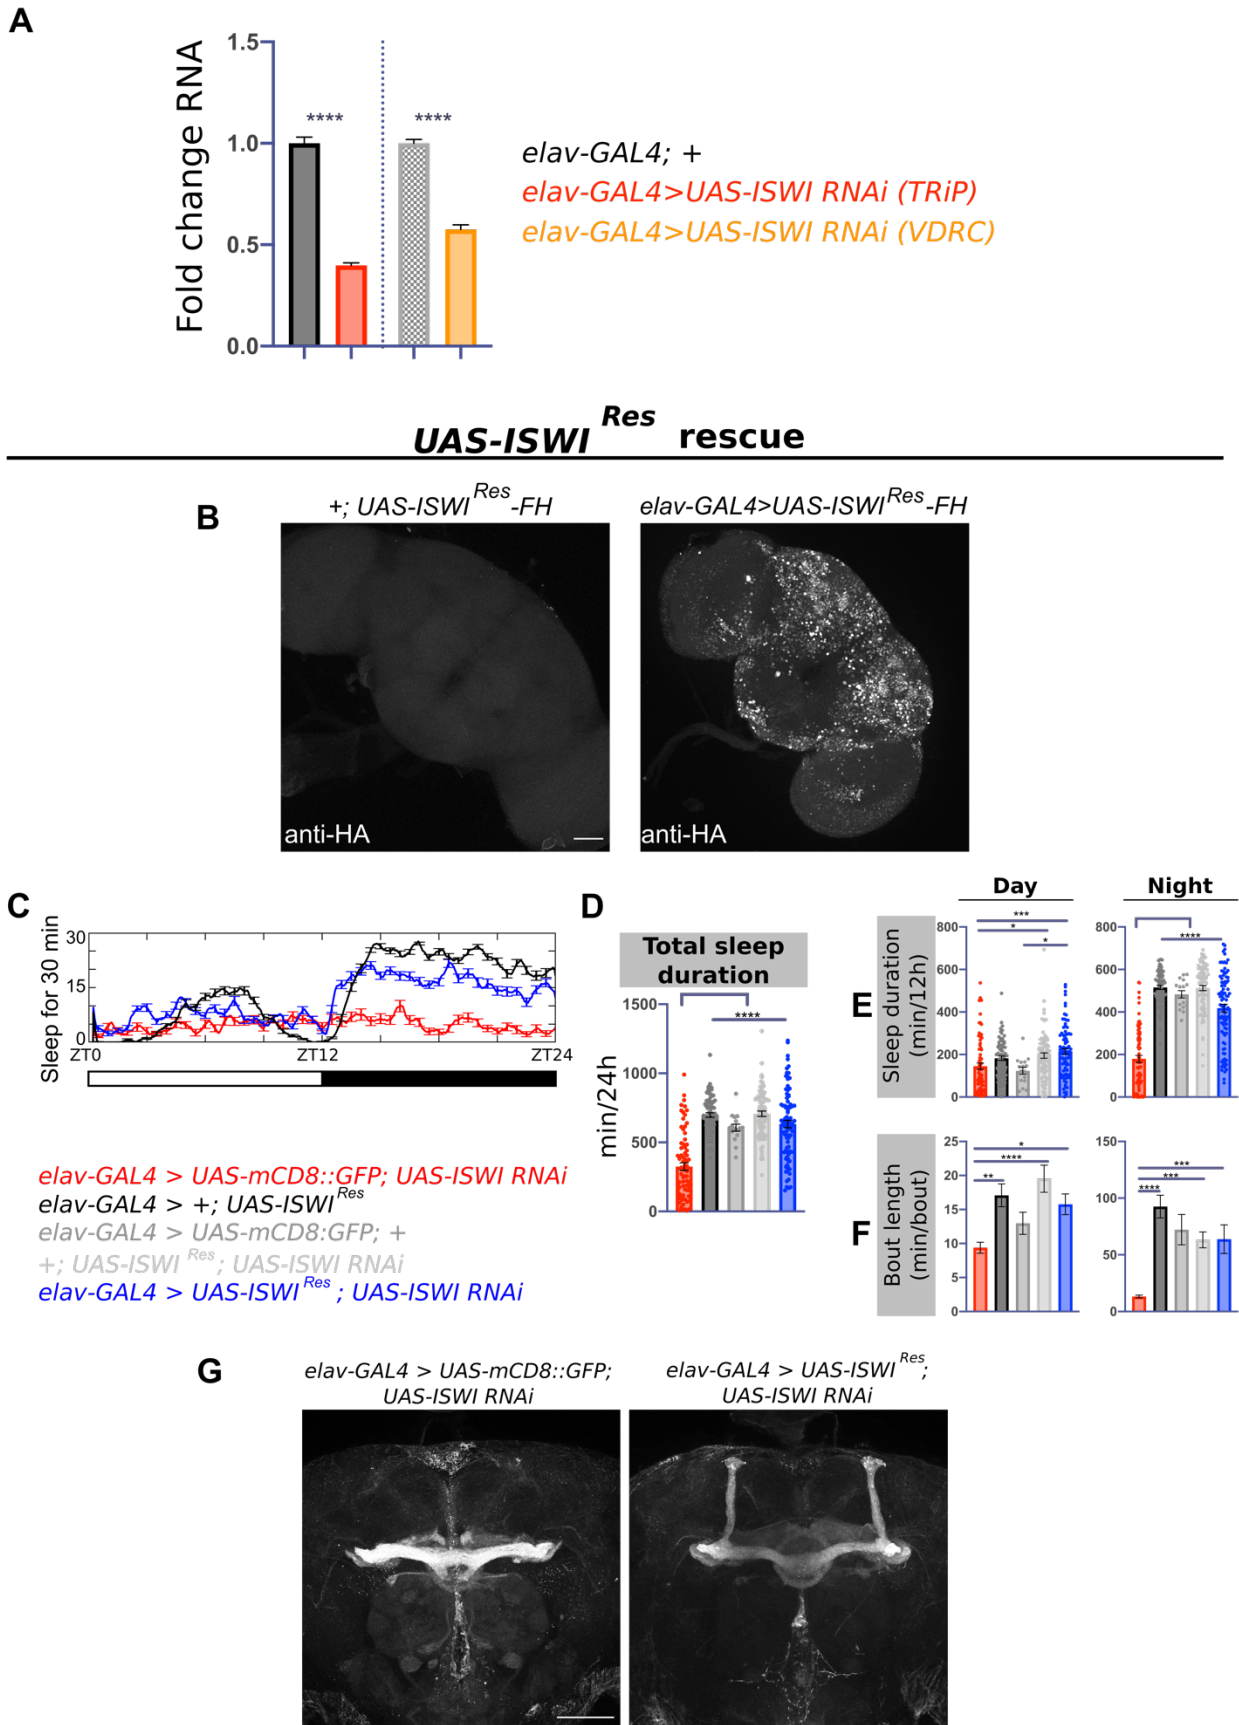

1026 **Fig. S2: Validation of *ISWI* knockdown.** A) qPCR for *ISWI* mRNA in the setting of  
1027 knockdown (n = 3 replicates,  $\geq 10$  brains per genotype per replicate). B) Immunostaining for HA  
1028 in adult fly brains confirms FLAG and HA-tagged *UAS-ISWI<sup>Res</sup>* is expressed. Negative control  
1029 (left) compared to *elav-GAL4>UAS-ISWI<sup>Res</sup>-FLAG-HA*. Scale bar, 50  $\mu$ m. C) Representative  
1030 sleep traces of *ISWI* knockdown (red), *ISWI<sup>Res</sup>* overexpression (black), and *ISWI<sup>Res</sup>* rescue (blue).  
1031 D) Total sleep in *ISWI<sup>Res</sup>* rescue compared to controls (n = 77, 71, 16, 81, 88 from left to right).  
1032 Day and night average E) sleep duration and F) sleep bout lengths in *ISWI<sup>Res</sup>* rescue compared to  
1033 controls. G) Example FasII immunostaining of adult fly mushroom bodies from *ISWI*  
1034 knockdown (left) and *ISWI<sup>Res</sup>* rescue (right). Scale bar, 50  $\mu$ m.

1035 Fig. S3

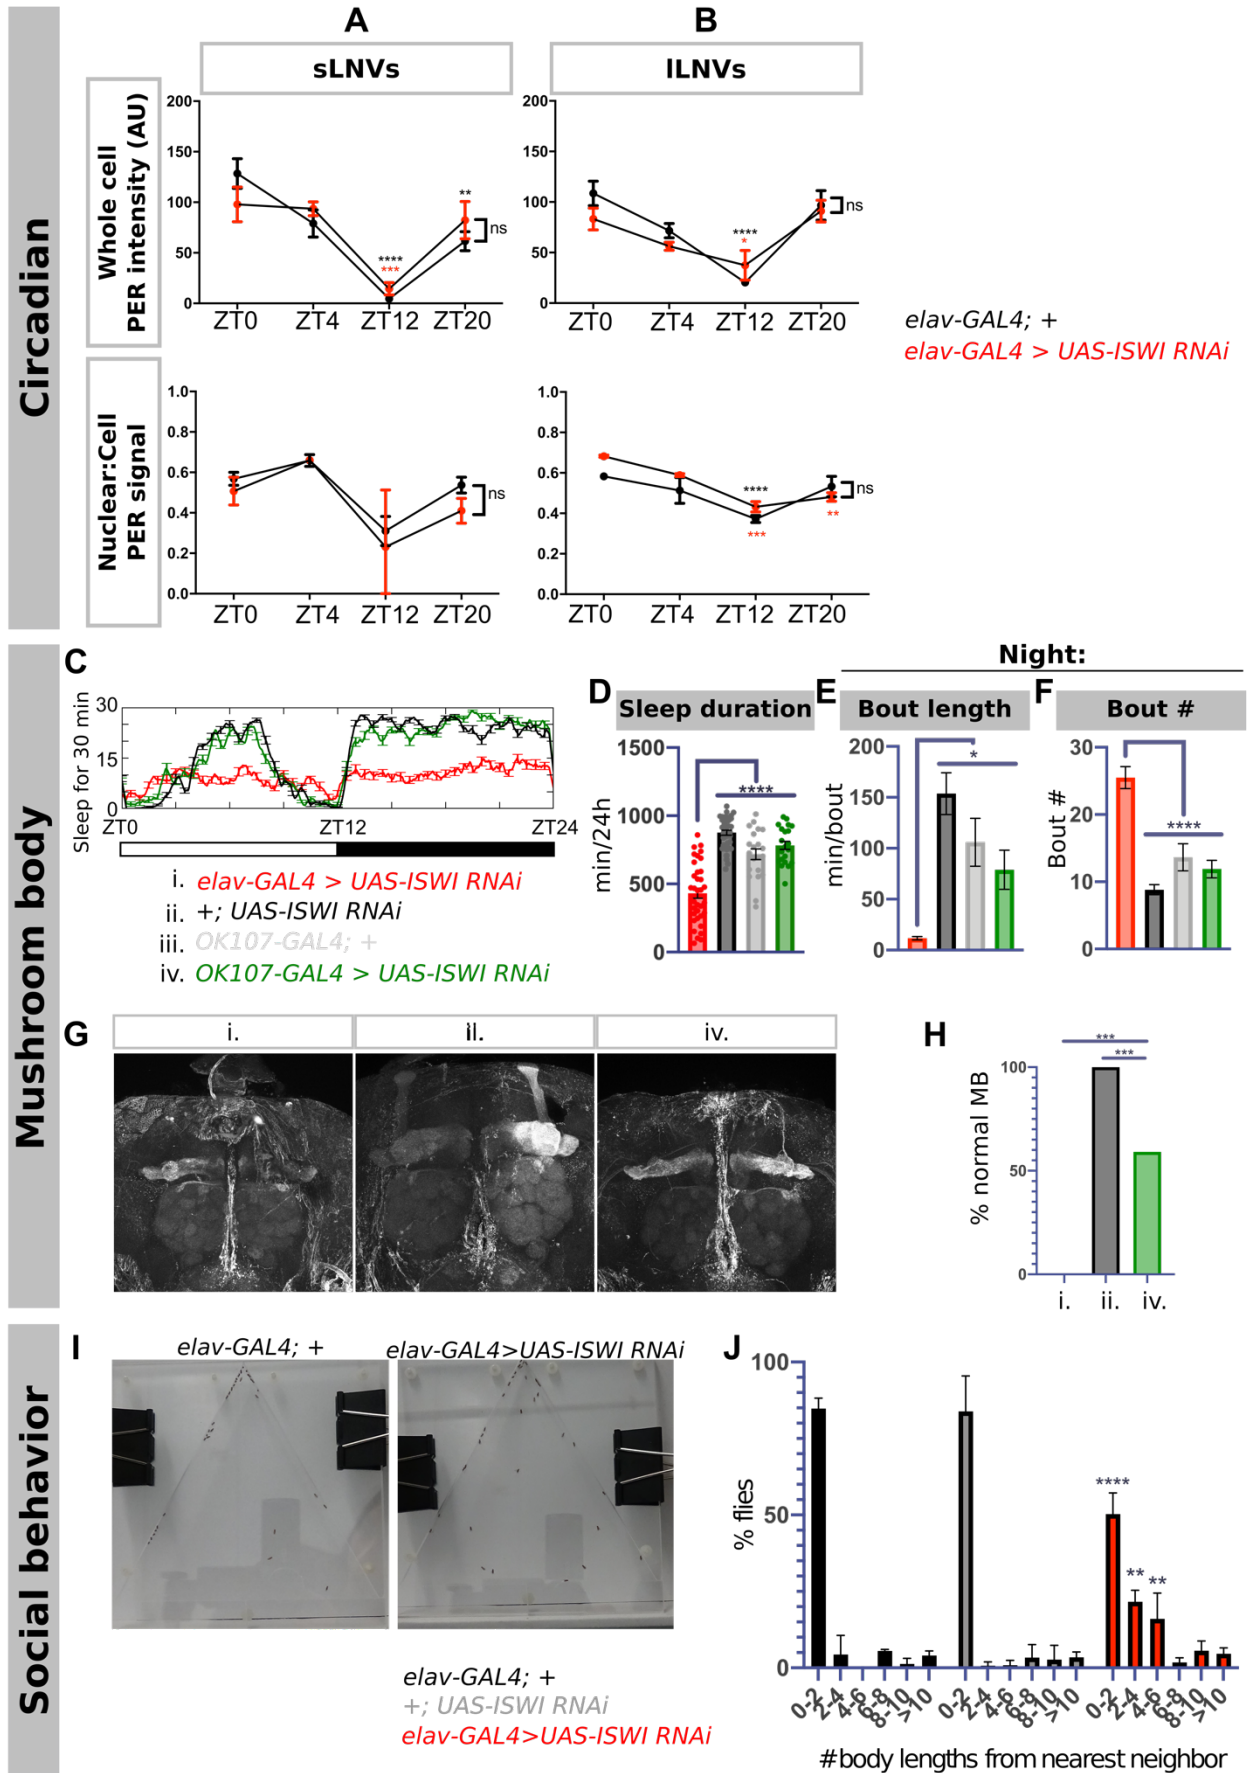

1036 **Fig. S3: Extended characterization of circadian, mushroom body morphology, and social**  
1037 **behavior deficits in the setting of *ISWI* knockdown.** Quantification of PER staining intensities  
1038 at ZT0, ZT4, ZT12, and ZT20 in A) small LNVs (sLNVs) and B) large LNVs (lLNVs). Whole  
1039 cell PER staining intensity (top graphs) vs nuclear:cell PER signal (bottom graphs) ( $n \geq 5$  brains  
1040 per genotype per timepoint) (two-way ANOVA; post-hoc Bonferroni's multiple comparison  
1041 tests. Asterisks represents significant differences compared to ZT0 for each genotype; brackets  
1042 represent comparison between groups, no significant difference noted at each timepoint). C)  
1043 Example sleep traces comparing *OK107-GAL4 > UAS-ISWI RNAi* (green), pan-neuronal *ISWI*  
1044 knockdown (red), and genetic controls (black and gray). D) Total sleep duration and nighttime E)  
1045 sleep bout length and F) sleep bout number in *OK107-GAL4 > UAS-ISWI RNAi* compared to  
1046 genetic controls and *elav-GAL4 > UAS-ISWI RNAi* ( $n = 36, 40, 21, 21$  from left to right).  
1047 Significance bars across multiple groups represent significant comparisons across all groups  
1048 compared to pan-neuronal knockdown. G) Example FasII immunostaining of adult fly brains in  
1049 the setting *ISWI* knockdown using *elav-GAL4* (left), genetic control (middle), and *OK107-GAL4*  
1050 (right). H) Quantification of FasII staining in *OK107-GAL4 > UAS-ISWI RNAi* as a binary of  
1051 normal or abnormal MB morphology ( $n = 20, 14, 22$  from left to right) (pairwise Fisher's Exact  
1052 Test). I) Sample image of social space arenas for each condition. J) Histogram distribution of  
1053 body length distances in social space arenas ( $n \geq 3$  replicates per genotype, 40 flies per replicate  
1054 per genotype) (Two-way ANOVA with post-hoc Tukey's multiple comparisons test; asterisks  
1055 denote significant bins in the *elav-GAL4 > UAS-ISWI RNAi* group compared to both genetic  
1056 controls in post-hoc testing).

1057 Fig. S4

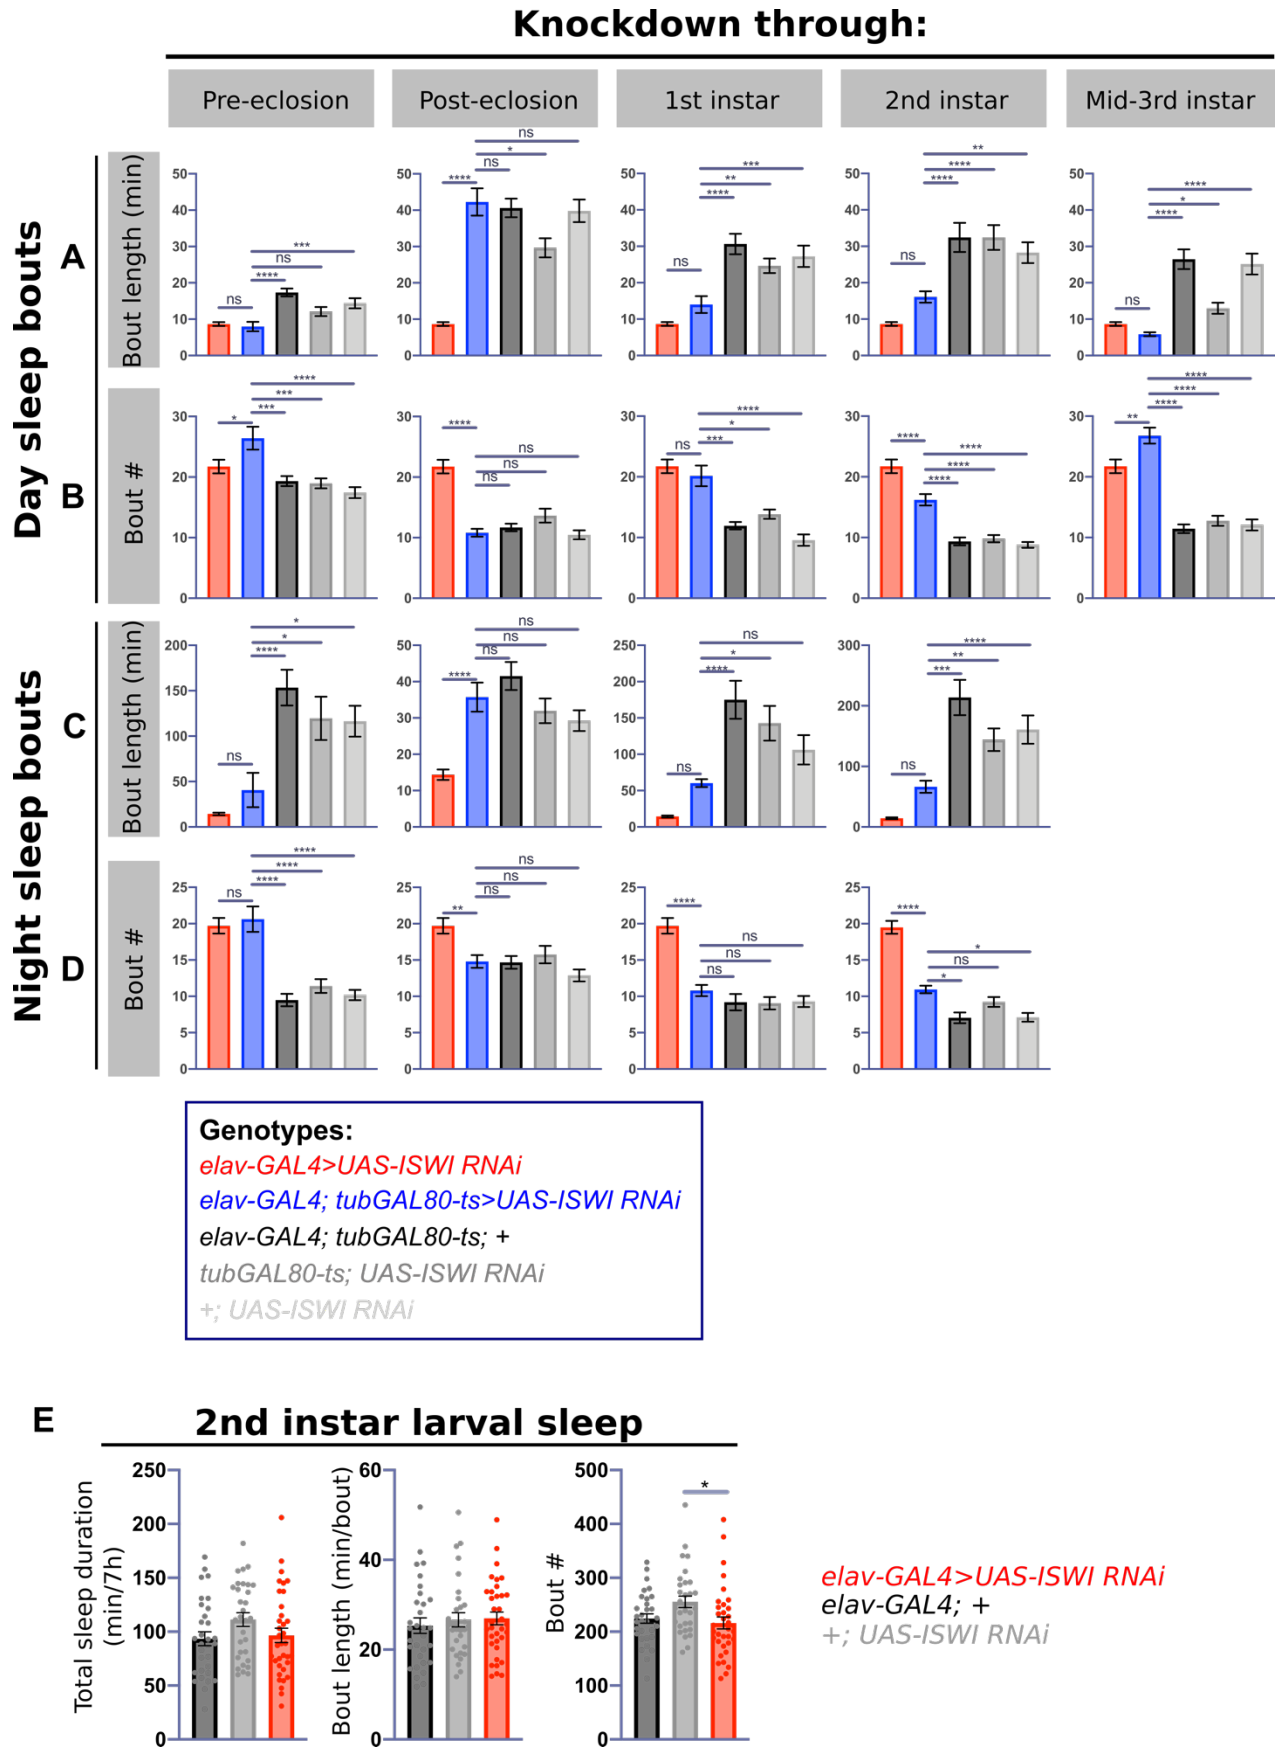

1058 **Fig. S4: Extended sleep characterization in temporally restricted *ISWI* knockdown and**  
1059 **during larval development.** Quantification of average daytime A) bout length and B) bout  
1060 number, and average nighttime C) bout length and D) bout number for *ISWI* knockdown through  
1061 pre-eclosion, post-eclosion, 1<sup>st</sup> instar, 2<sup>nd</sup> instar, and mid-3<sup>rd</sup> instar (left to right) (sample sizes for  
1062 each knockdown condition are denoted in the legend for figure 3). E) Quantification of total  
1063 sleep during a 7-hour period during 2<sup>nd</sup> instar in the setting of *ISWI* knockdown (n = 31, 31, 55  
1064 from left to right).



1065 Fig. S5

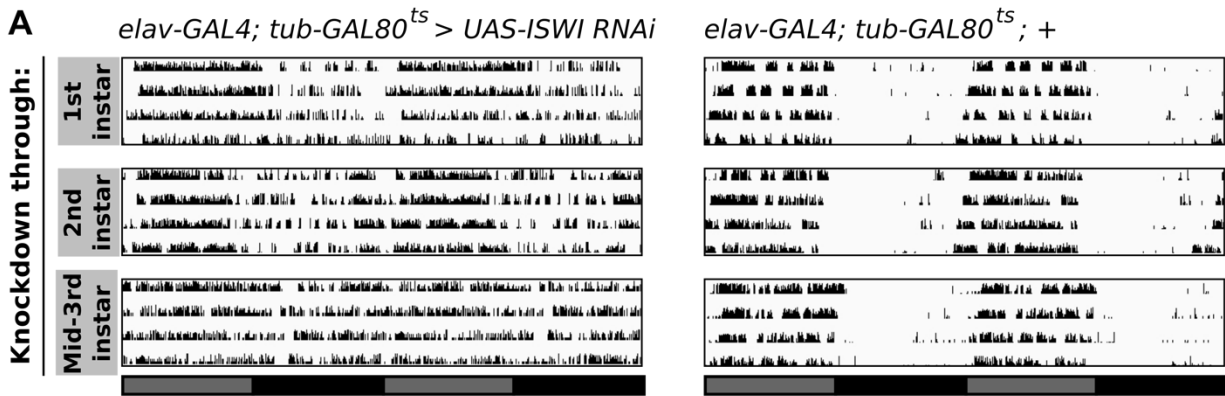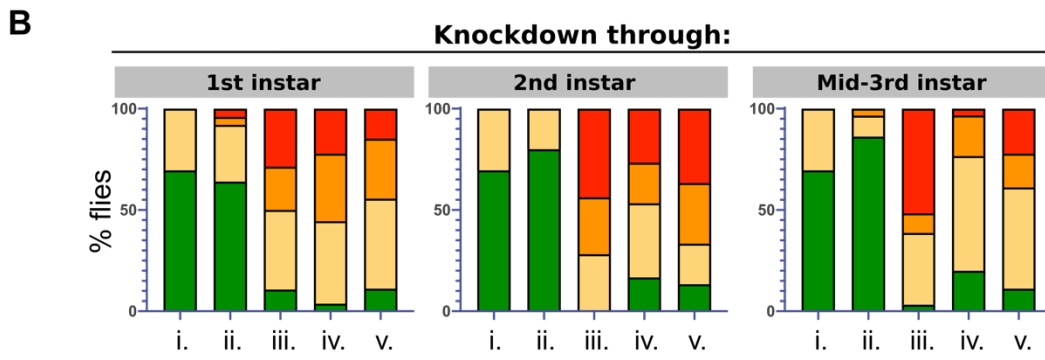

**Genotypes:**

i. *elav-GAL4>UAS-ISWI RNAi*

ii. *elav-GAL4; tubGAL80-ts>UAS-ISWI RNAi*

iii. *elav-GAL4; tubGAL80-ts; +*

iv. *tubGAL80-ts; UAS-ISWI RNAi*

v. *+; UAS-ISWI RNAi*

strongly rhythmic (FFT ≥ 0.05)

moderately rhythmic (0.03 ≤ FFT < 0.05)

weakly rhythmic (0.01 ≤ FFT < 0.03)

arrhythmic (FFT < 0.01)

1066 **Fig. S5: Extended characterization of circadian rhythms in the setting of temporally**  
1067 **restricted *ISWI* knockdown.** A) Representative actograms of temporally-restricted *ISWI*  
1068 knockdown (left) through 1<sup>st</sup>, 2<sup>nd</sup>, or mid-3<sup>rd</sup> instar (top to bottom), compared to a genetic control  
1069 exposed to the same temperature shifts (right). B) Proportion of strongly rhythmic, moderately  
1070 rhythmic, weakly rhythmic, and arrhythmic flies in the setting of *ISWI* knockdown at different  
1071 points in development compared to constitutive knockdown and in genetic controls.

1072 Fig. S6

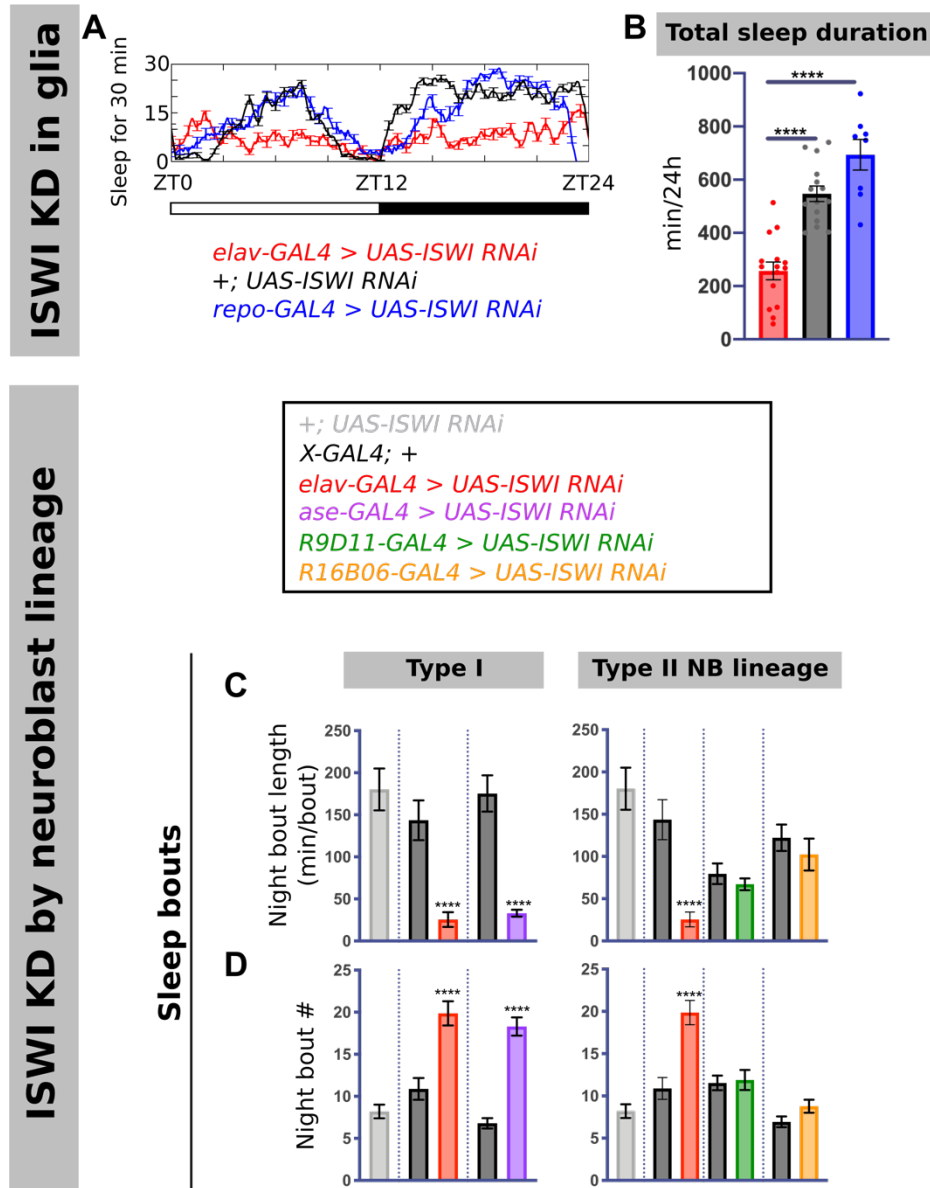

1073 **Fig. S6: *ISWI* knockdown in glia and extended sleep characterization of knockdown in**  
1074 **neuroblast lineages.** A) Representative sleep traces and B) quantification of total sleep duration  
1075 with *ISWI* knockdown in glia (blue) compared to genetic control (black) and *elav-GAL4*  
1076 knockdown (red) (n = 15, 15, 8 from left to right). Nighttime C) sleep bout length and D) sleep  
1077 bout number with *ISWI* knockdown in different neuroblast lineages (for sample sizes see figure 5  
1078 legend).



1080 **Fig. S7: Further characterization of *R23E10* neurons in the setting of *ISWI* knockdown.** A)  
1081 Representative sleep traces and B) quantification of total sleep in *R23E10-GAL4 > UAS-ISWI*  
1082 *RNAi* (blue) compared to genetic controls (black and gray) and pan-neuronal *ISWI* knockdown  
1083 (red) (n = 29, 22, 8, 16 from left to right). C) Quantification of dFB volume (top) and number of  
1084 *R23E10* soma (bottom) as measured by GFP immunostaining in temporally-restricted *ISWI*  
1085 knockdown (red) compared to genetic controls exposed to the same temperature shifts (black) (n  
1086 = 7, 10, 15, 10 brains from left to right). D) Formula to calculate sleep differences per individual  
1087 fly resulting from *R23E10* thermogenetic activation. E) Day (left) and night (right) individual fly  
1088 sleep duration differences resulting from thermogenetic activation of *R23E10* neurons, in the  
1089 setting of *ISWI* knockdown (red) compared to negative controls (lacking *23E10>TrpA1*) with  
1090 and without pan-neuronal *ISWI* knockdown (gray and blue) and positive control (with  
1091 *23E10>TrpA1*) without *ISWI* knockdown (black) (see figure 6 legend for sample size).

1092 Fig. S8

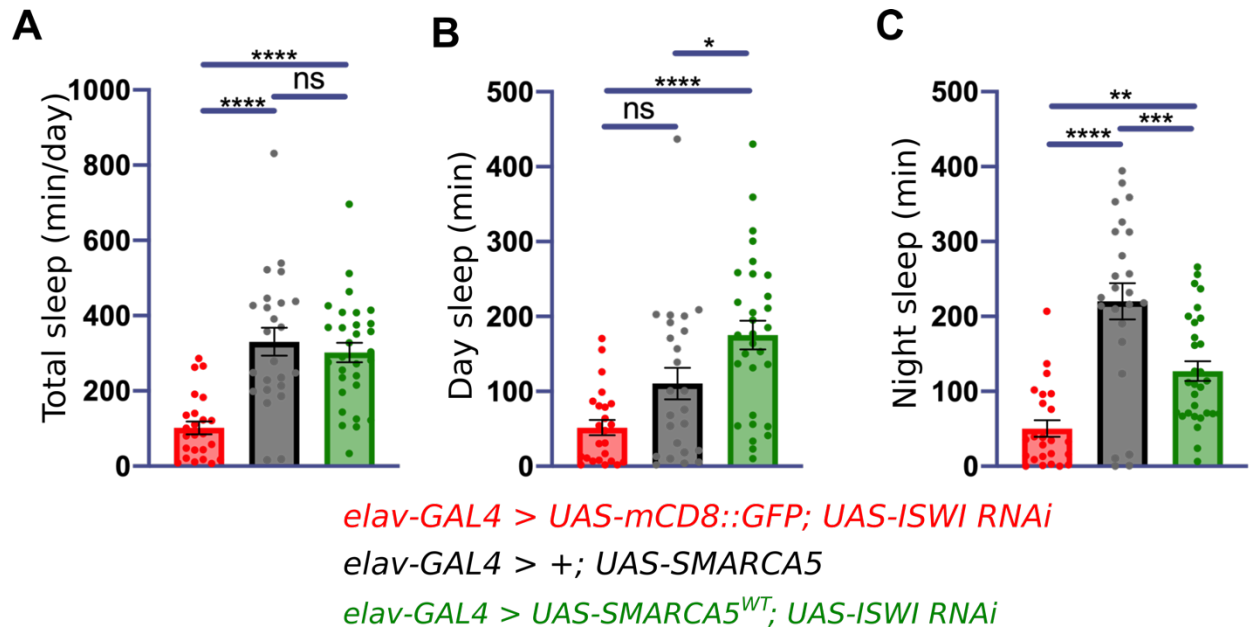

1093 **Fig. S8: High resolution sleep monitoring for *SMARCA5<sup>WT</sup>* rescue in the setting of *ISWI***  
1094 **knockdown confirms sleep rescue.** Quantification of A) total sleep duration, B) day sleep  
1095 duration, and C) night sleep duration from multibeam monitoring of *SMARCA5<sup>WT</sup>* rescue (green)  
1096 in the setting of pan-neuronal *ISWI* knockdown, along with pan-neuronal *ISWI* knockdown (red),  
1097 and *SMARCA5<sup>WT</sup>* overexpression alone (black) (n = 24, 24, 30 from left to right).





1099 **Fig. S9: Gene network analysis reveals increased connectivity between *SMARCA5* and**  
1100 **human genes regulating sleep and circadian functions.** A) RNA-Seq experiment design. B)  
1101 Visualization of differentially expressed genes (upregulated – gray, downregulated – red) in the  
1102 setting of *ISWI* knockdown ( $n \geq 3$  replicates per genotype,  $\geq 40$  larval brains per replicate; see  
1103 methods for statistical tests, adjusted  $P > 0.1$ ). *ISWI* ( $P\text{-adj} = 5.14 \times 10^{-230}$ ) and *dsx* ( $P\text{-adj} = 1.27$   
1104  $\times 10^{-109}$ ) were not included in the graph to facilitate visualizing other genes. C) Visualized  
1105 connectivity between *SMARCA5* (yellow), human orthologs of *Drosophila* RNA-Seq targets  
1106 (red), and human sleep and circadian genes (blue). Connector genes are denoted in green. D)  
1107 Quantification of connectivity (inverse of shortest path length) between *SMARCA1* and  
1108 *SMARCA5* and all genes in the network (blue) and RNA-Seq targets (red), as well as between  
1109 *SMARCA5* and human sleep and circadian genes (green) (two-tailed T-tests). E) Representative  
1110 enriched GO Biological Process terms ( $P < 0.05$ , Fisher's Exact test with Benjamini-Hochberg  
1111 correction) among connector genes between *SMARCA1* and *SMARCA5* and RNA-Seq target  
1112 genes or human sleep and circadian genes.

1113 **Table S1**

| <b>Genotype</b>                                                                                                                            | <b>n</b> | <b>SR %</b> | <b>MR %</b> | <b>WR %</b> | <b>AR %</b> | <b>FFT ± SEM</b> |
|--------------------------------------------------------------------------------------------------------------------------------------------|----------|-------------|-------------|-------------|-------------|------------------|
| <i>elav-GAL4; +</i>                                                                                                                        | 58       | 27.6        | 41.4        | 29.3        | 1.7         | 0.042 ± 0.003    |
| <i>+; UAS-ISWI RNAi</i>                                                                                                                    | 55       | 27.3        | 34.5        | 32.7        | 5.5         | 0.036 ± 0.002    |
| <i>elav-GAL4 &gt; UAS-ISWI RNAi</i>                                                                                                        | 70       | 1.4         | 2.9         | 35.7        | 60.0        | 0.011 ± 0.001    |
| SR = strongly rhythmic (FFT ≥ 0.05); MR = moderately rhythmic (0.03 - 0.05); WR = weakly rhythmic (0.01 - 0.03); AR = arrhythmic (< 0.01). |          |             |             |             |             |                  |

1114 **Table S1:** Percentage of strongly rhythmic, moderately rhythmic, weakly rhythmic, and  
1115 arrhythmic flies in *elav-GAL4 > UAS-ISWI RNAi* flies and in genetic controls as defined by FFT  
1116 amplitude. Mean FFT amplitude with SEM shown for each genotype.

1117 Table S2

| Genotype                                                                                                                                   | n  | SR % | MR % | WR % | AR % | FFT ± SEM     |
|--------------------------------------------------------------------------------------------------------------------------------------------|----|------|------|------|------|---------------|
| <i>elav-GAL4 &gt; UAS-ISWI RNAi</i>                                                                                                        | 23 | 0.0  | 0.0  | 30.4 | 69.6 | 0.007 ± 0.001 |
| <b>KD through 1st instar</b>                                                                                                               |    |      |      |      |      |               |
| <i>elav-GAL4; tub-GAL80ts &gt; UAS-ISWI RNAi</i>                                                                                           | 25 | 4.0  | 4.0  | 28.0 | 64.0 | 0.012 ± 0.003 |
| <i>elav-GAL4; tub-GAL80ts; +</i>                                                                                                           | 28 | 28.6 | 21.4 | 39.3 | 10.7 | 0.041 ± 0.006 |
| <i>tub-GAL80ts; UAS-ISWI RNAi</i>                                                                                                          | 27 | 22.2 | 33.3 | 40.7 | 3.7  | 0.037 ± 0.004 |
| <i>+; UAS-ISWI RNAi</i>                                                                                                                    | 27 | 14.8 | 29.6 | 44.4 | 11.1 | 0.033 ± 0.005 |
| <b>KD through 2nd instar</b>                                                                                                               |    |      |      |      |      |               |
| <i>elav-GAL4; tub-GAL80ts &gt; UAS-ISWI RNAi</i>                                                                                           | 30 | 0.0  | 0.0  | 20.0 | 80.0 | 0.008 ± 0.001 |
| <i>elav-GAL4; tub-GAL80ts; +</i>                                                                                                           | 32 | 43.8 | 28.1 | 28.1 | 0.0  | 0.050 ± 0.005 |
| <i>tub-GAL80ts; UAS-ISWI RNAi</i>                                                                                                          | 30 | 26.7 | 20.0 | 36.7 | 16.7 | 0.037 ± 0.005 |
| <i>+; UAS-ISWI RNAi</i>                                                                                                                    | 30 | 36.7 | 30.0 | 20.0 | 13.3 | 0.044 ± 0.006 |
| <b>KD through mid-3rd instar</b>                                                                                                           |    |      |      |      |      |               |
| <i>elav-GAL4; tub-GAL80ts &gt; UAS-ISWI RNAi</i>                                                                                           | 29 | 0.0  | 3.4  | 10.3 | 86.2 | 0.006 ± 0.002 |
| <i>elav-GAL4; tub-GAL80ts; +</i>                                                                                                           | 31 | 51.6 | 9.7  | 35.5 | 3.2  | 0.050 ± 0.006 |
| <i>tub-GAL80ts; UAS-ISWI RNAi</i>                                                                                                          | 30 | 3.3  | 20.0 | 56.7 | 20.0 | 0.024 ± 0.005 |
| <i>+; UAS-ISWI RNAi</i>                                                                                                                    | 18 | 22.2 | 16.7 | 50.0 | 11.1 | 0.034 ± 0.007 |
| SR = strongly rhythmic (FFT ≥ 0.05); MR = moderately rhythmic (0.03 - 0.05); WR = weakly rhythmic (0.01 - 0.03); AR = arrhythmic (< 0.01). |    |      |      |      |      |               |

1118 **Table S2:** Percentage of strongly strongly rhythmic, moderately rhythmic, weakly rhythmic, and  
1119 arrhythmic flies as defined by FFT amplitude for temporally restricted *ISWI* knockdown through  
1120 the noted time points. Mean FFT amplitude with SEM shown for each genotype and temporal  
1121 knockdown condition.
